# Supplementary material for: Improved taxonomic assignment of human intestinal 16S rRNA sequences by a dedicated reference database
Source: PubMed Central journal article supplement (PMC4676846; doi:10.1186/s12864-015-2265-y), 2015-12-12

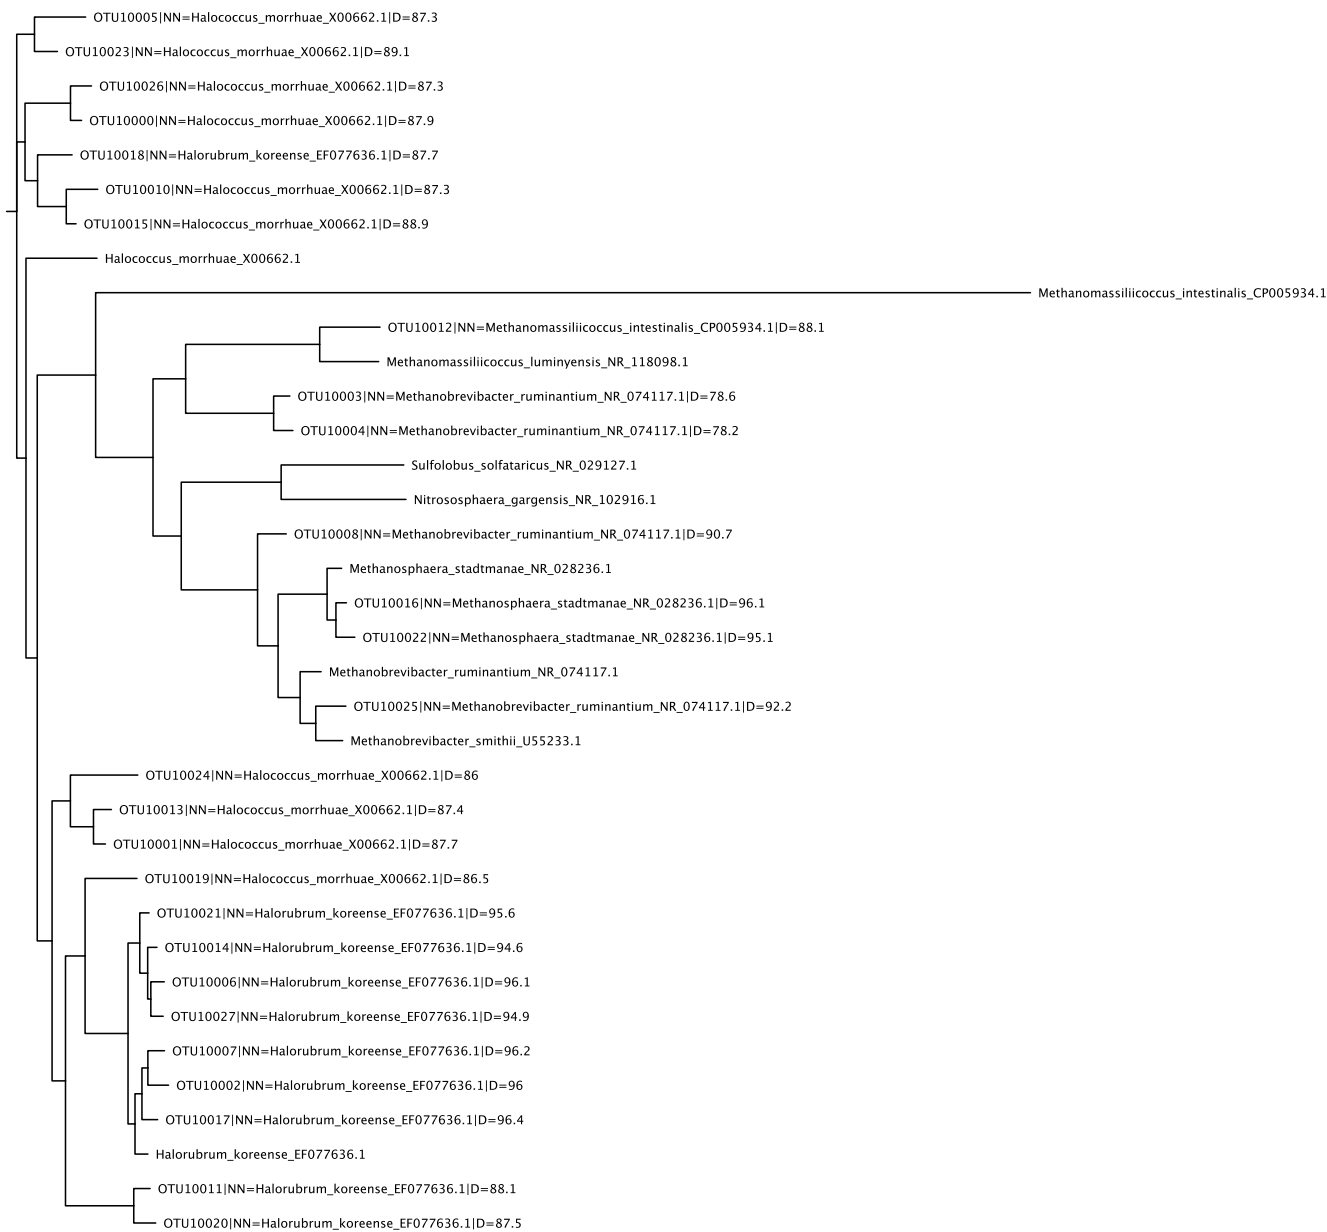

0.2

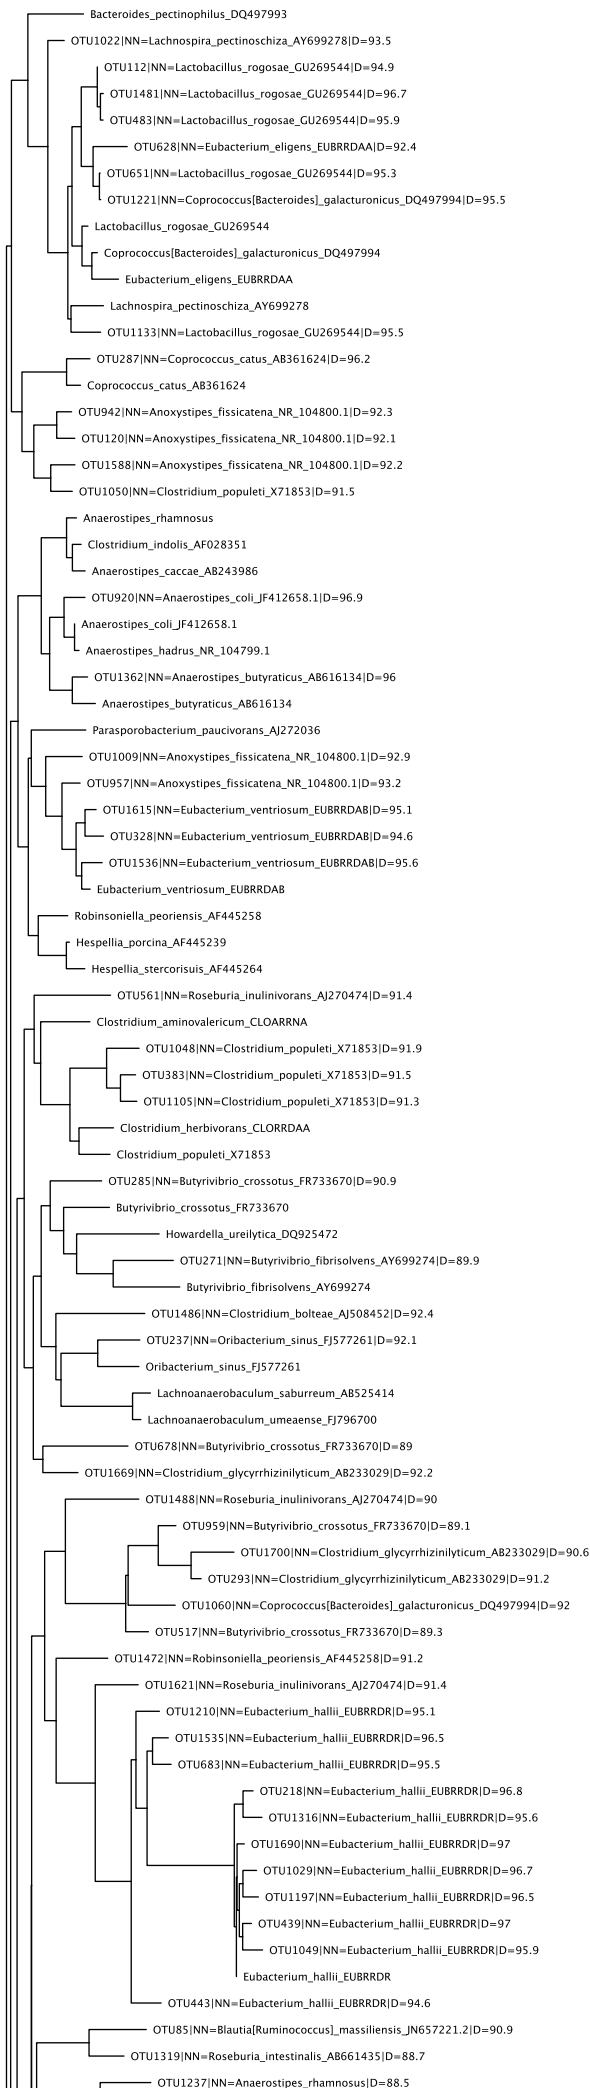

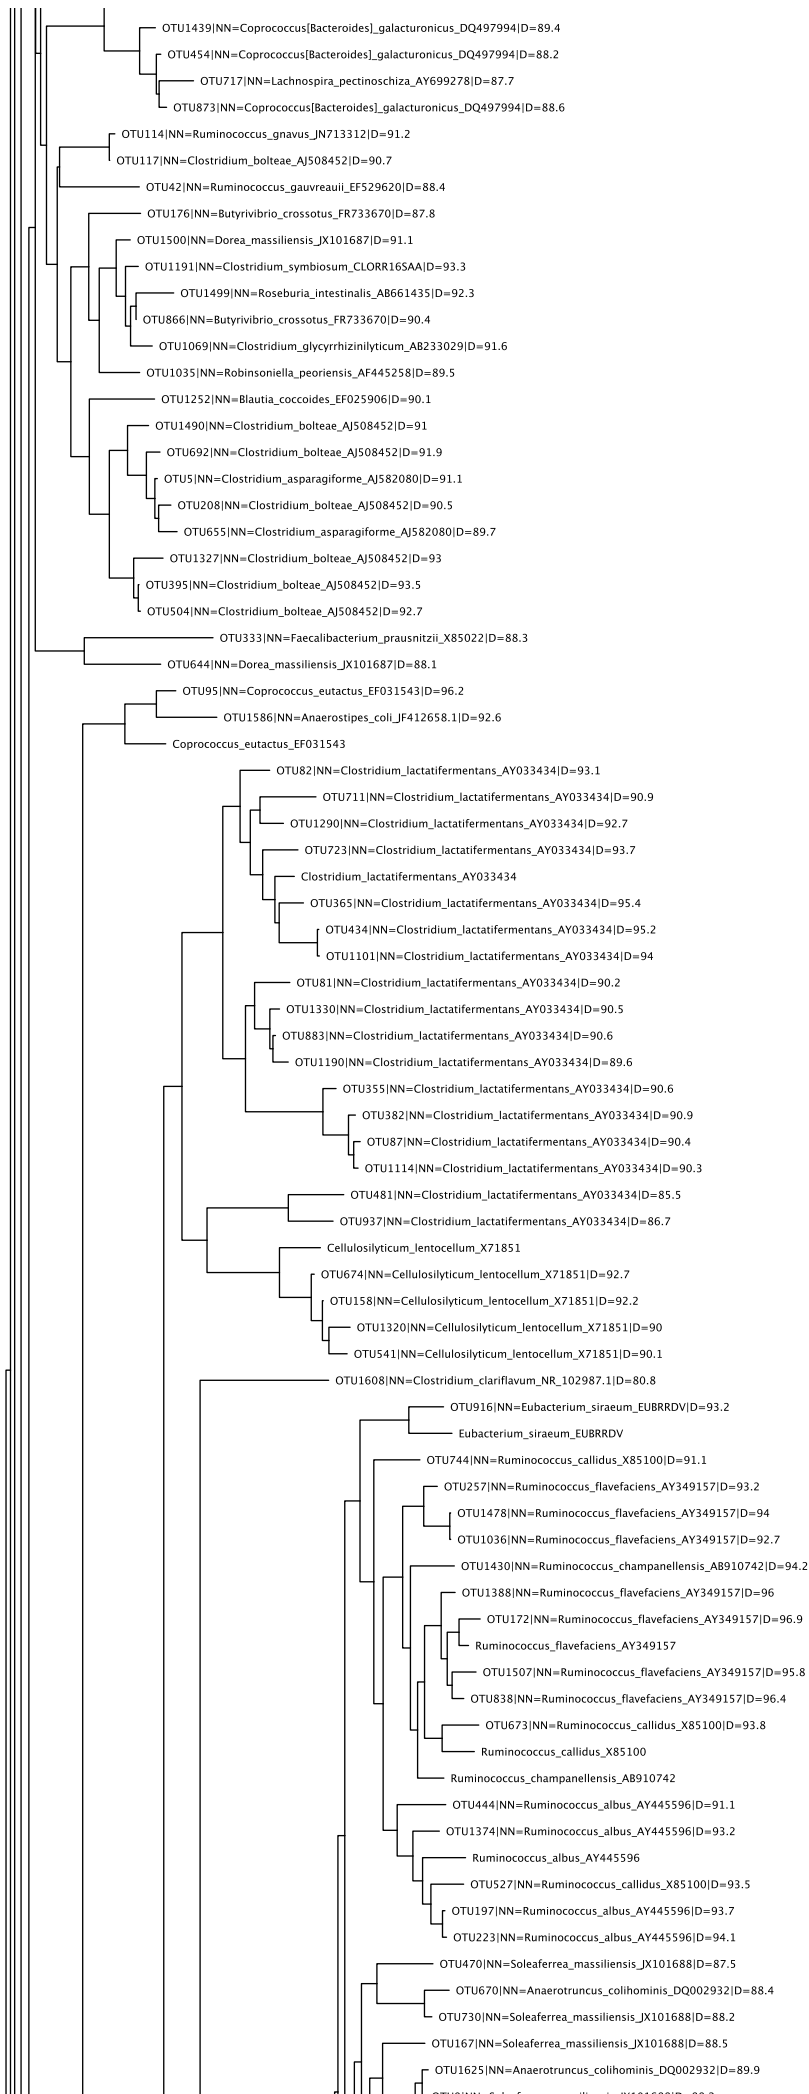

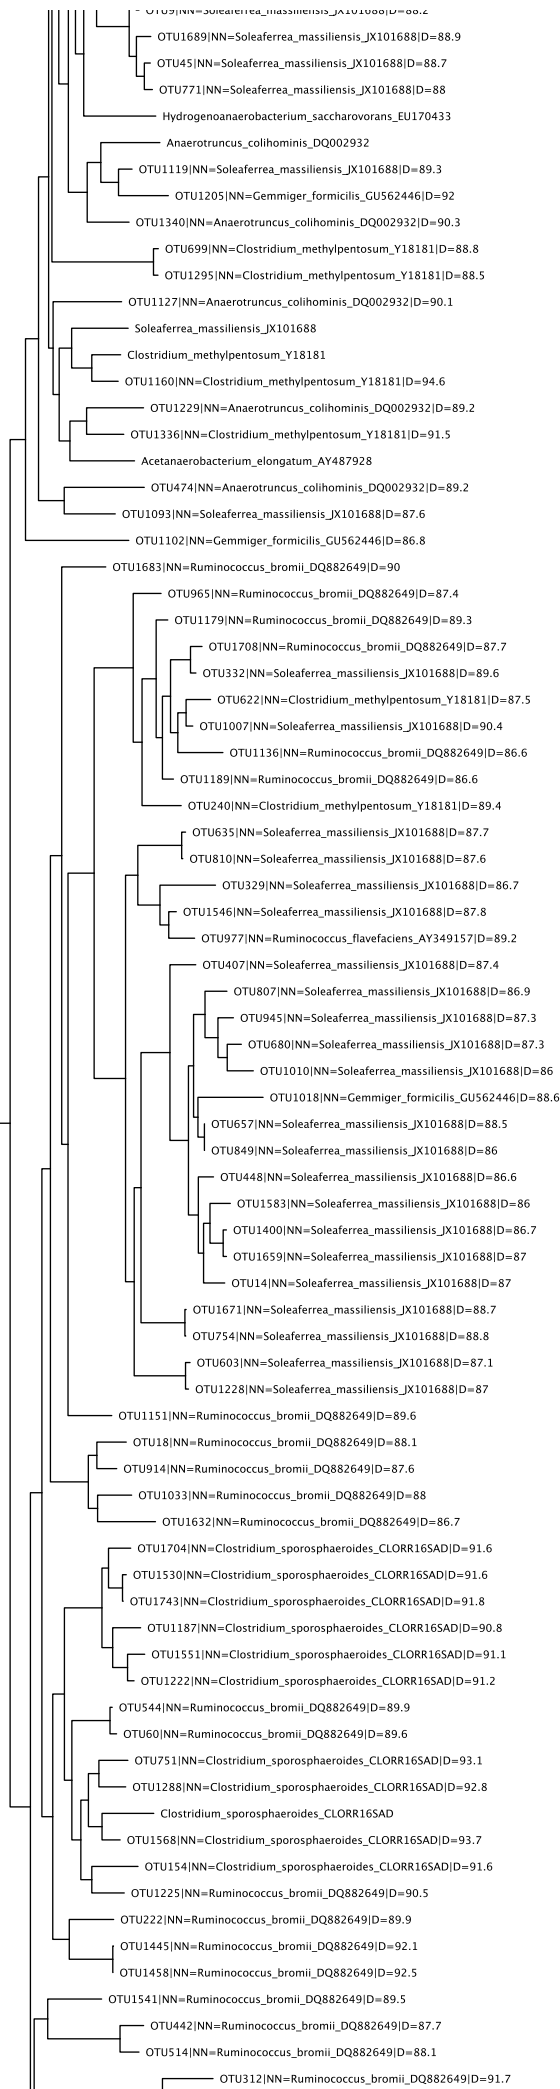



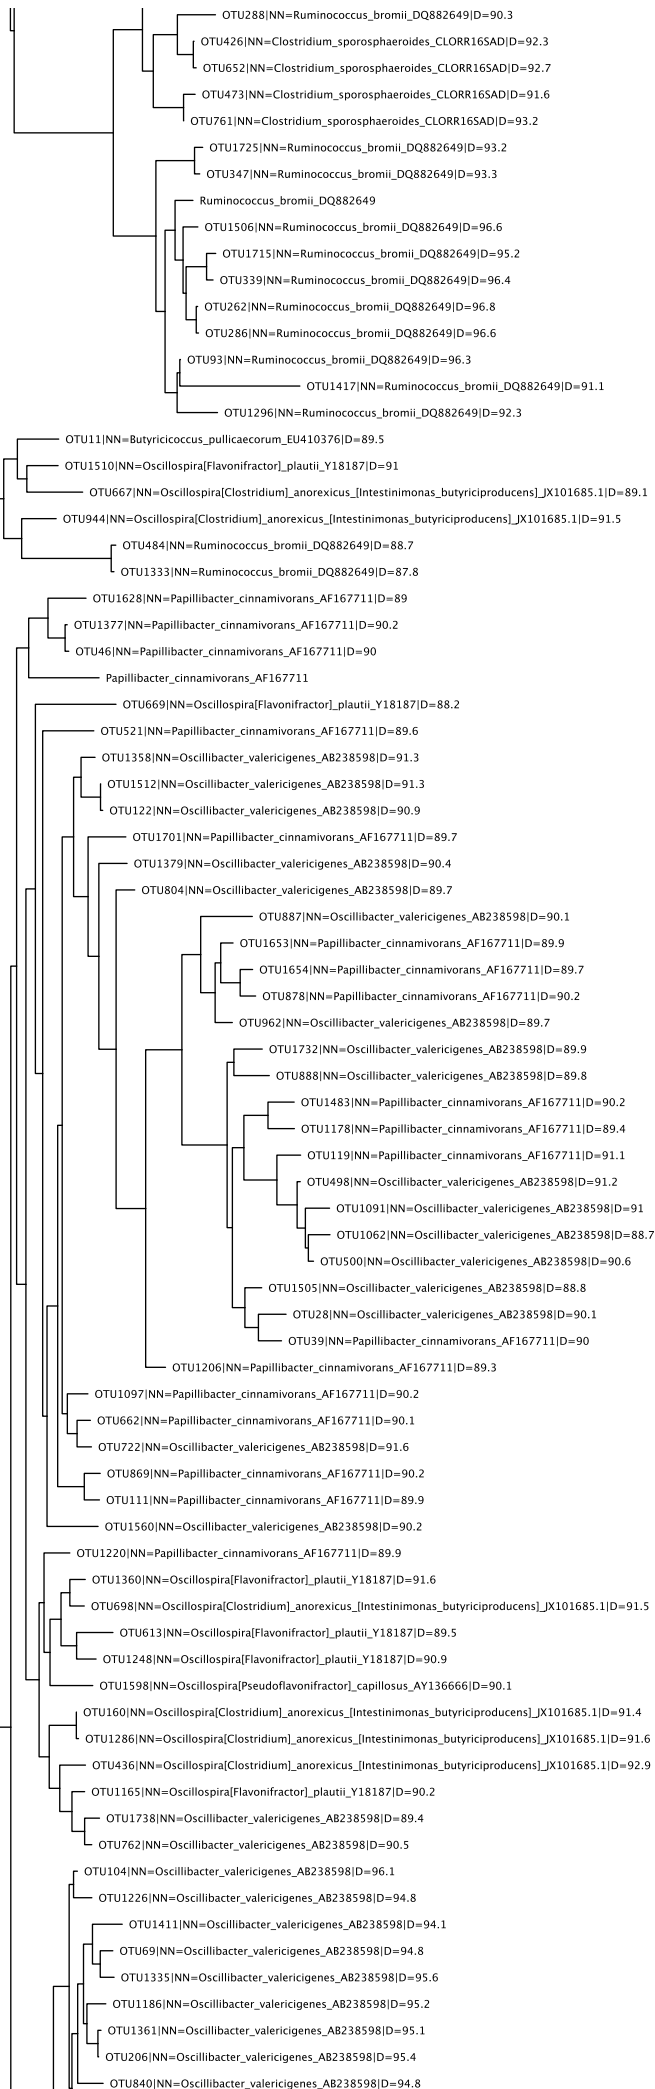

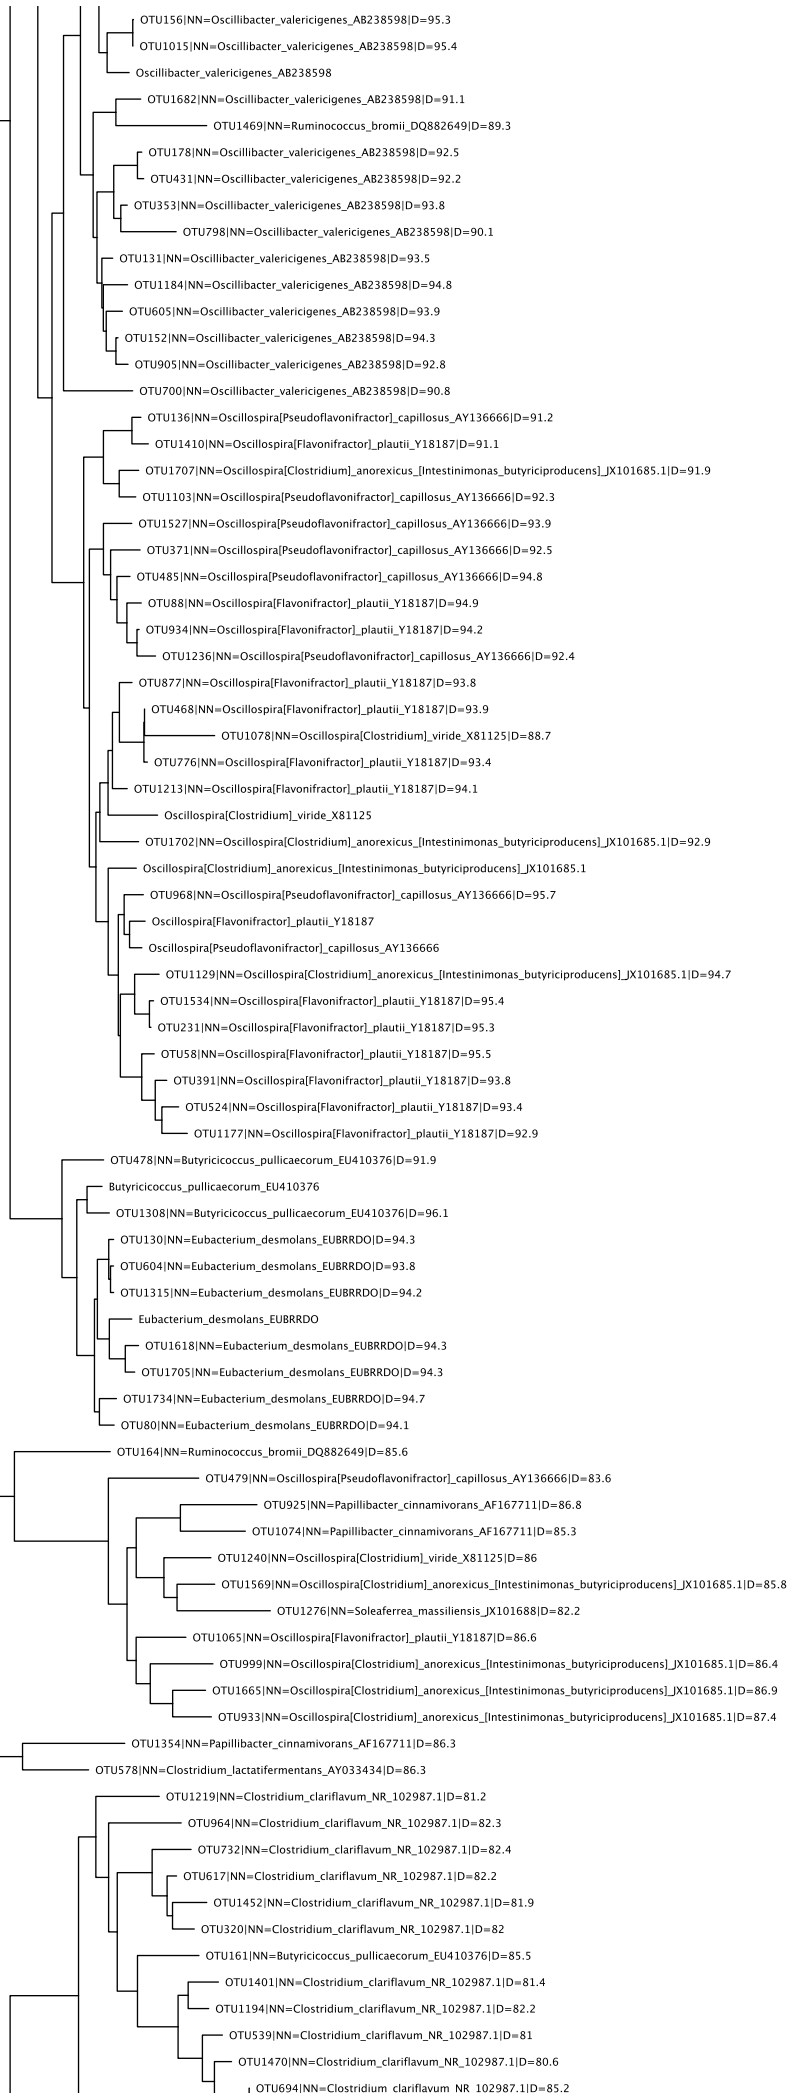

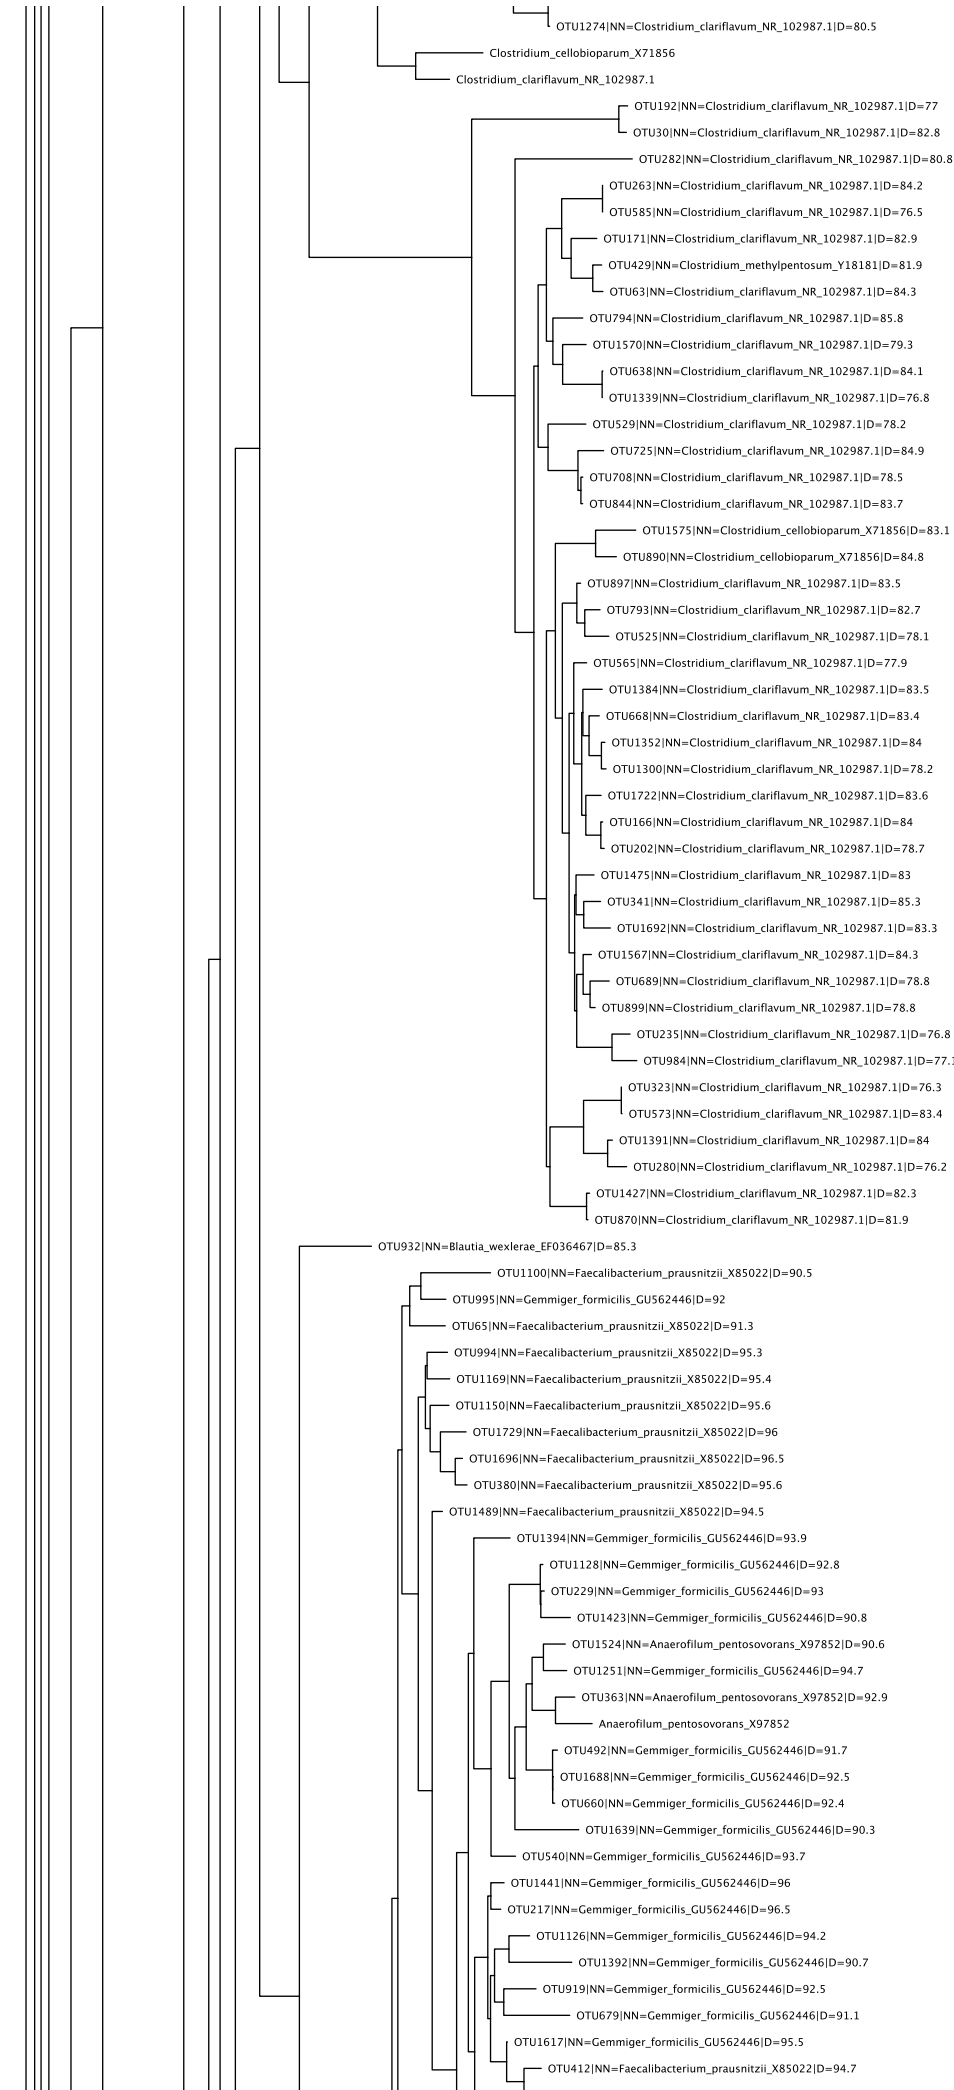

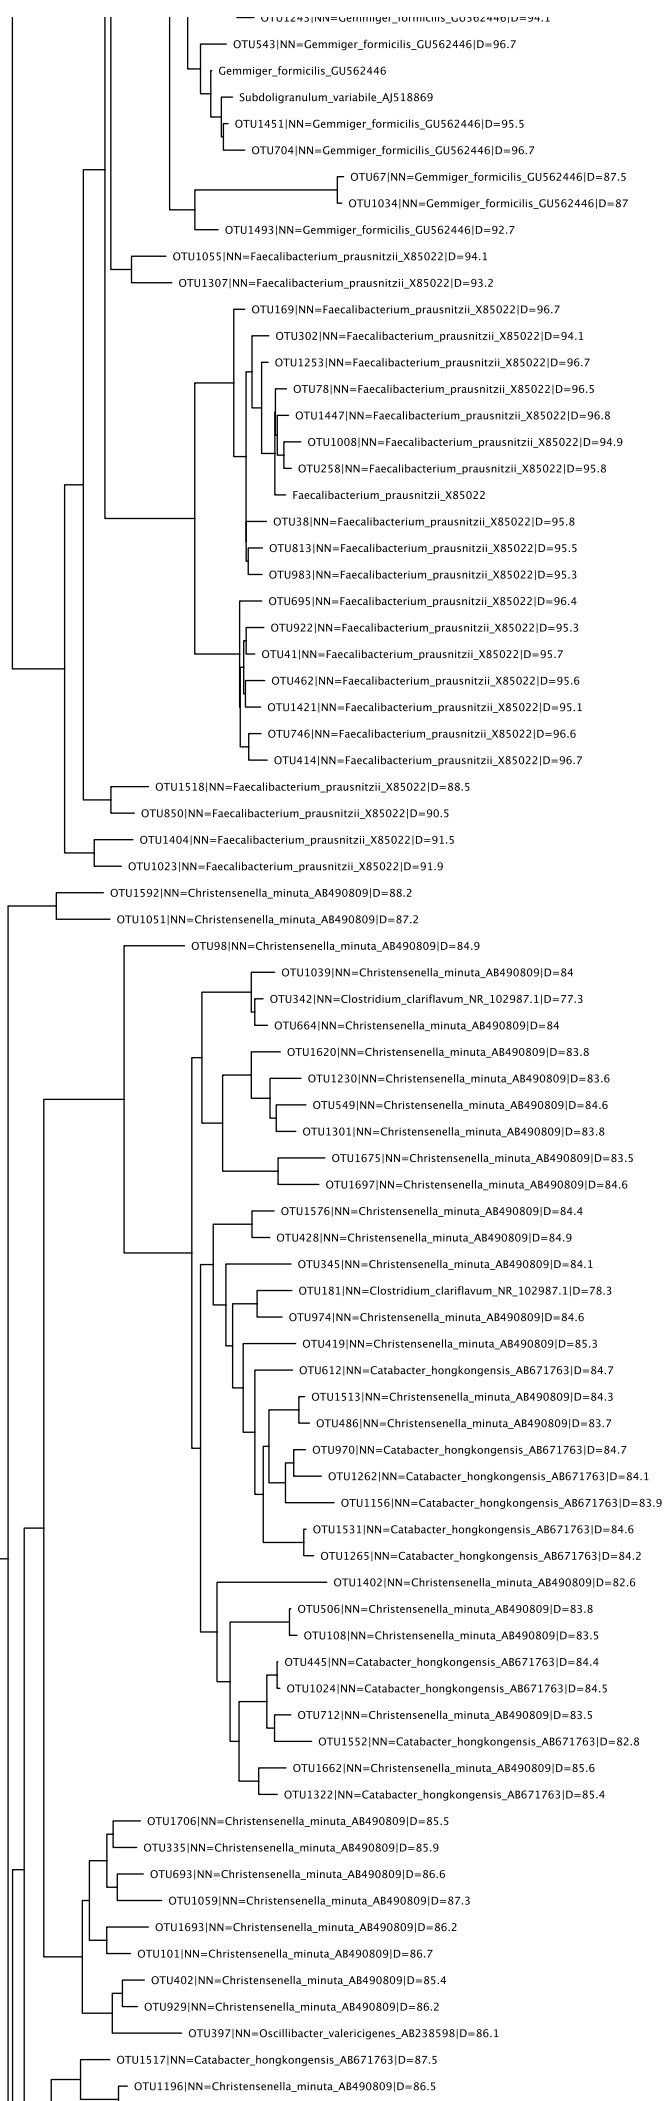

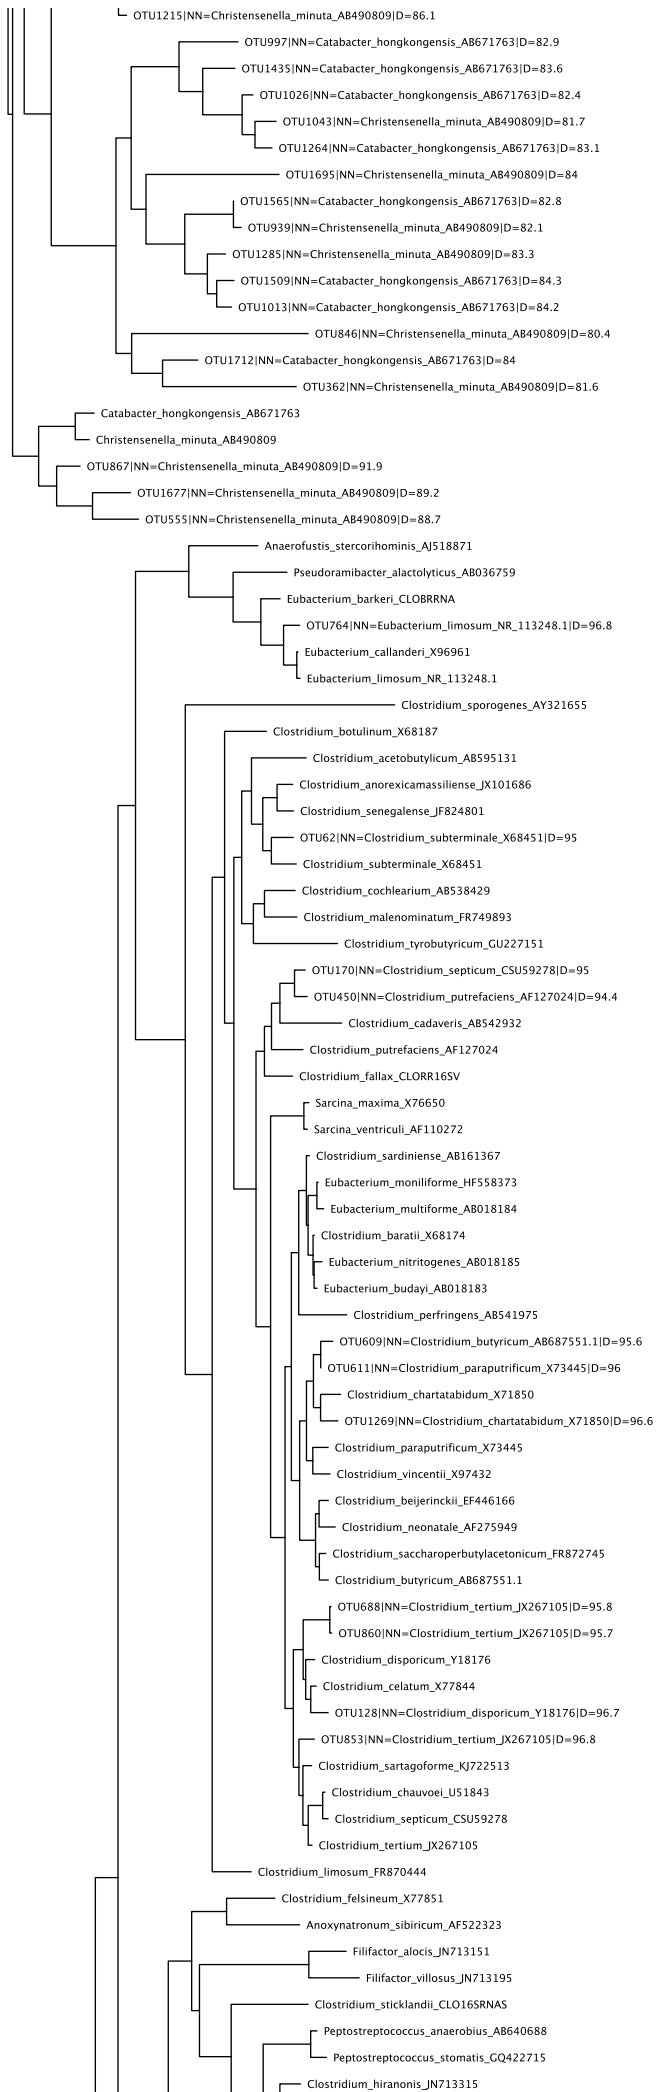

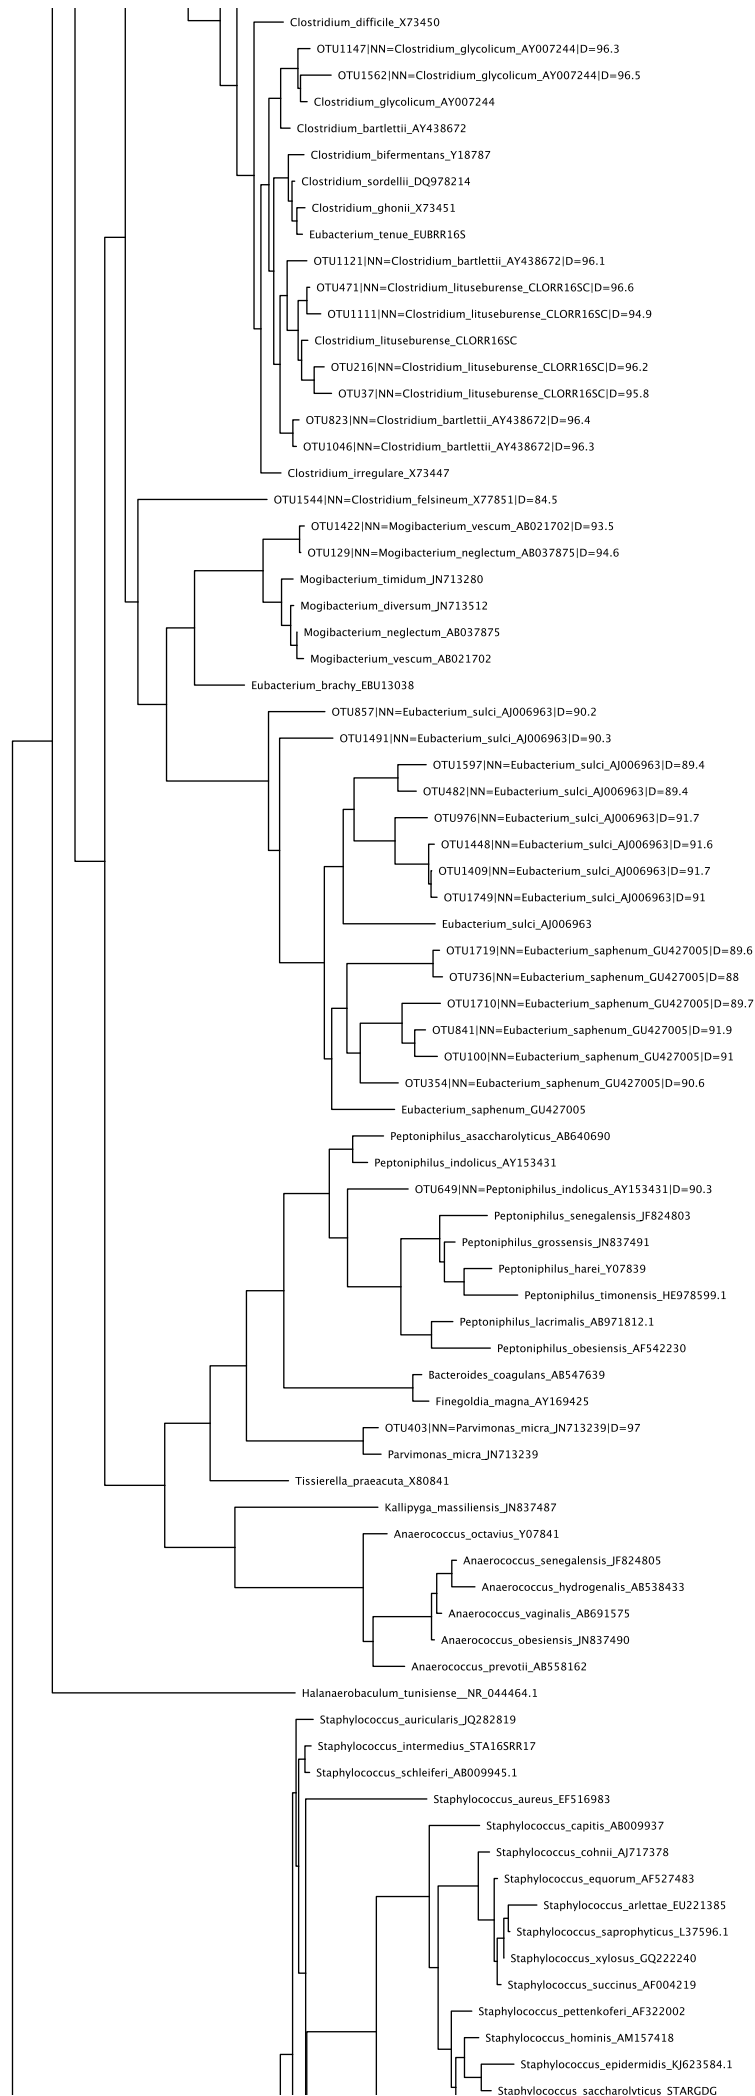

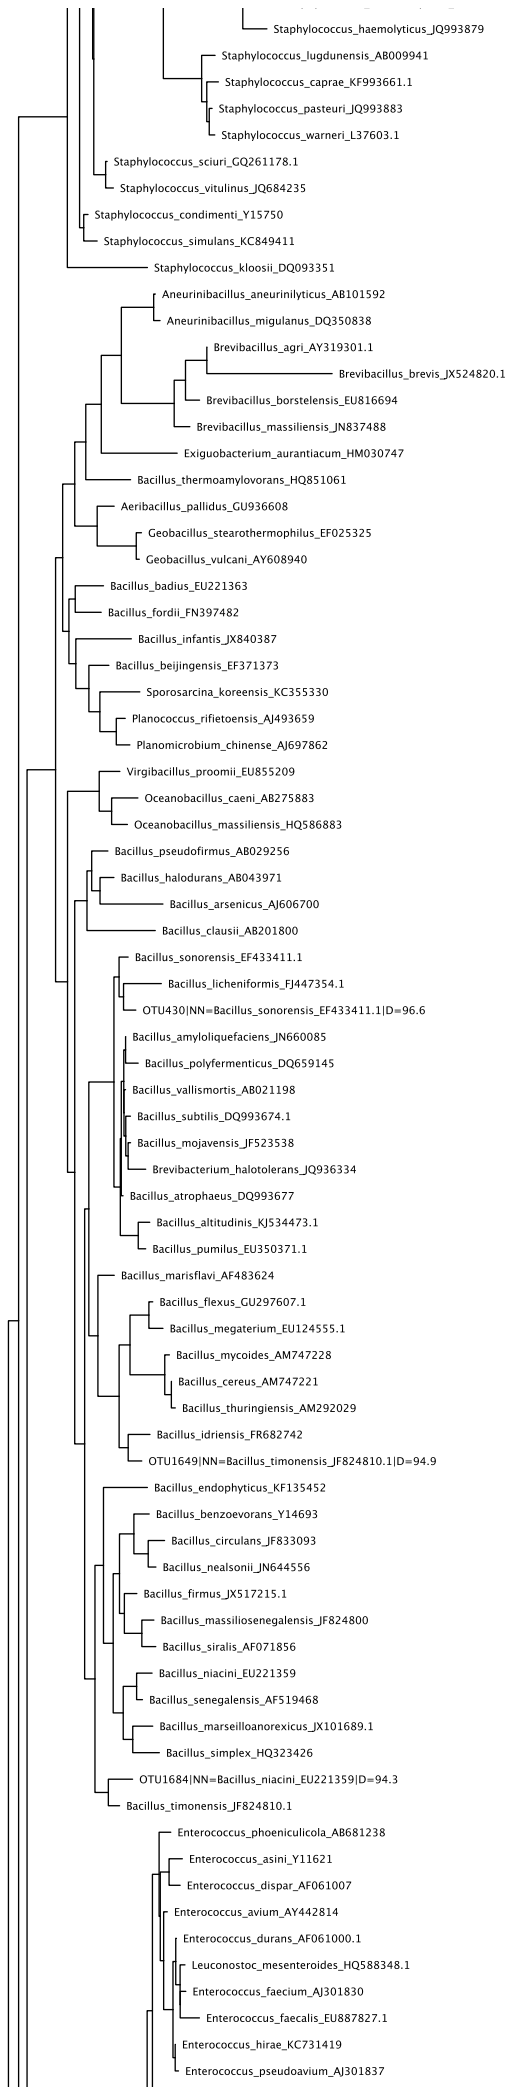

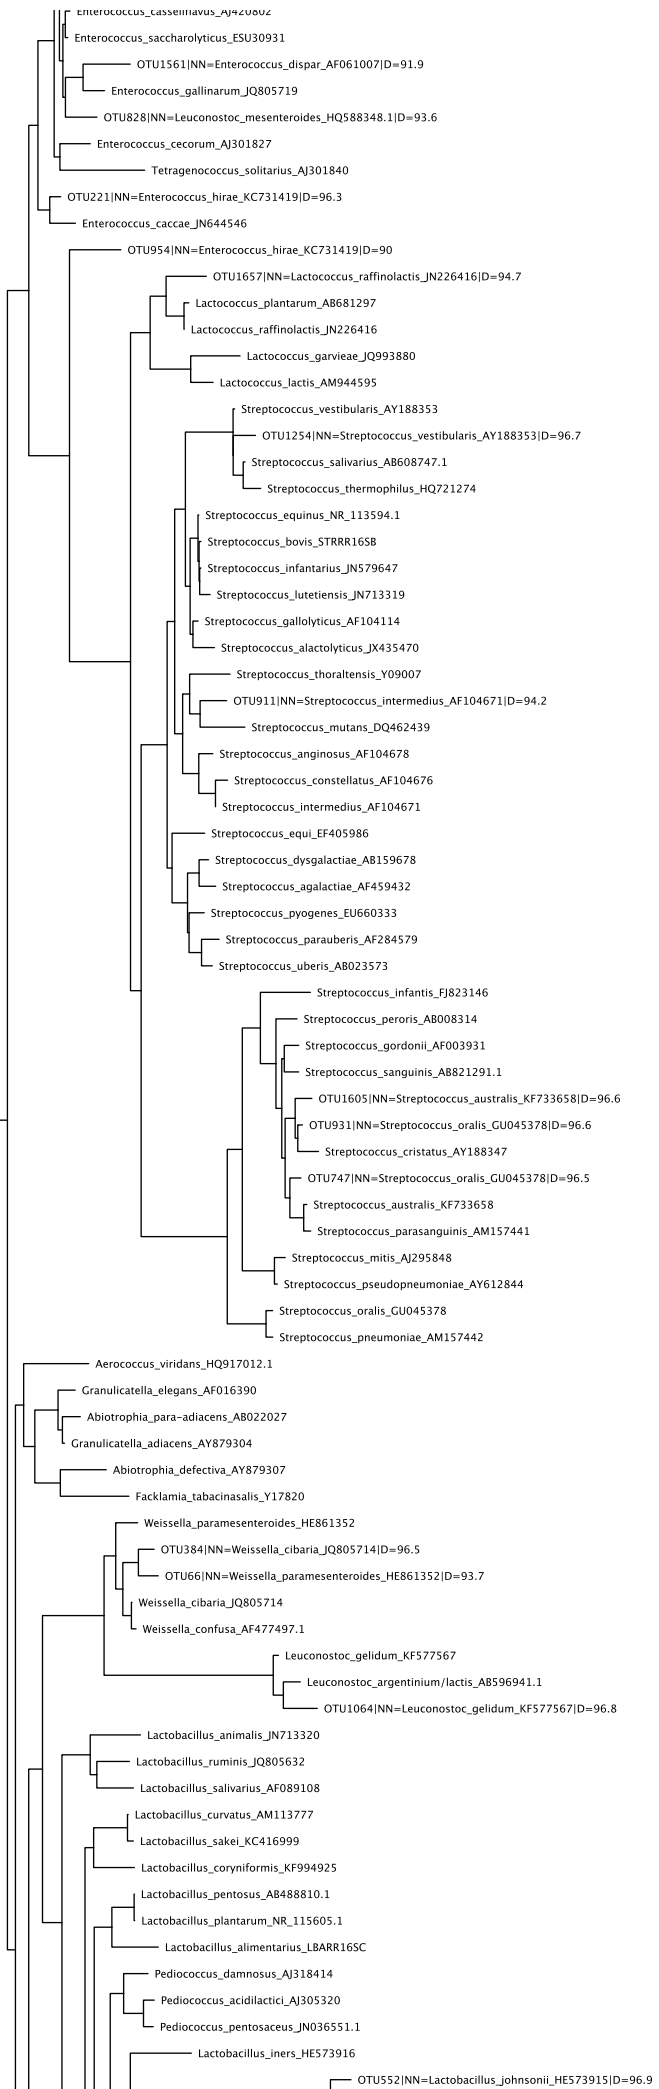



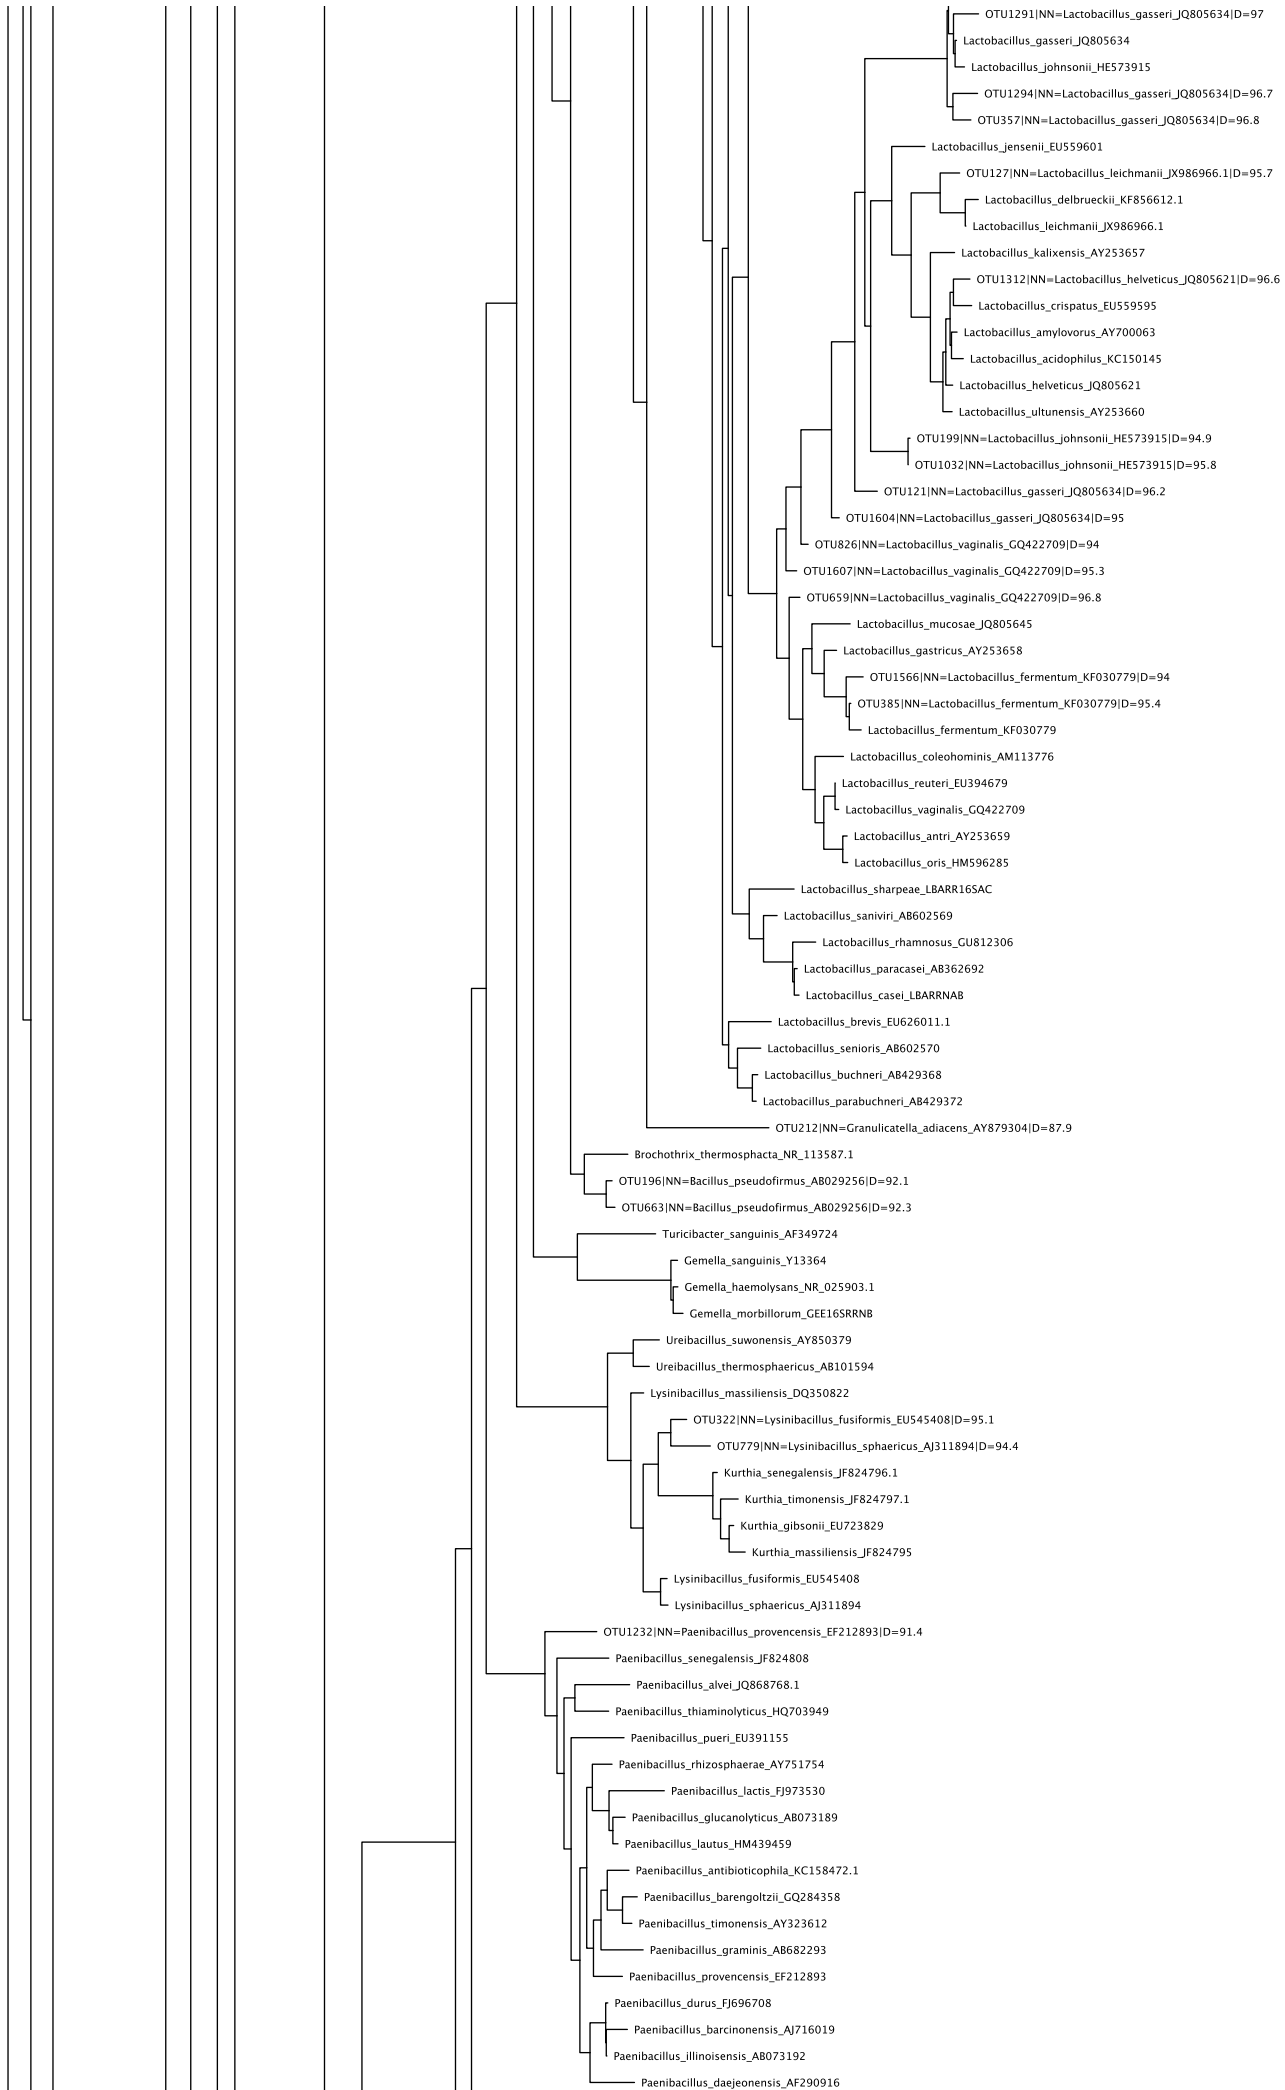

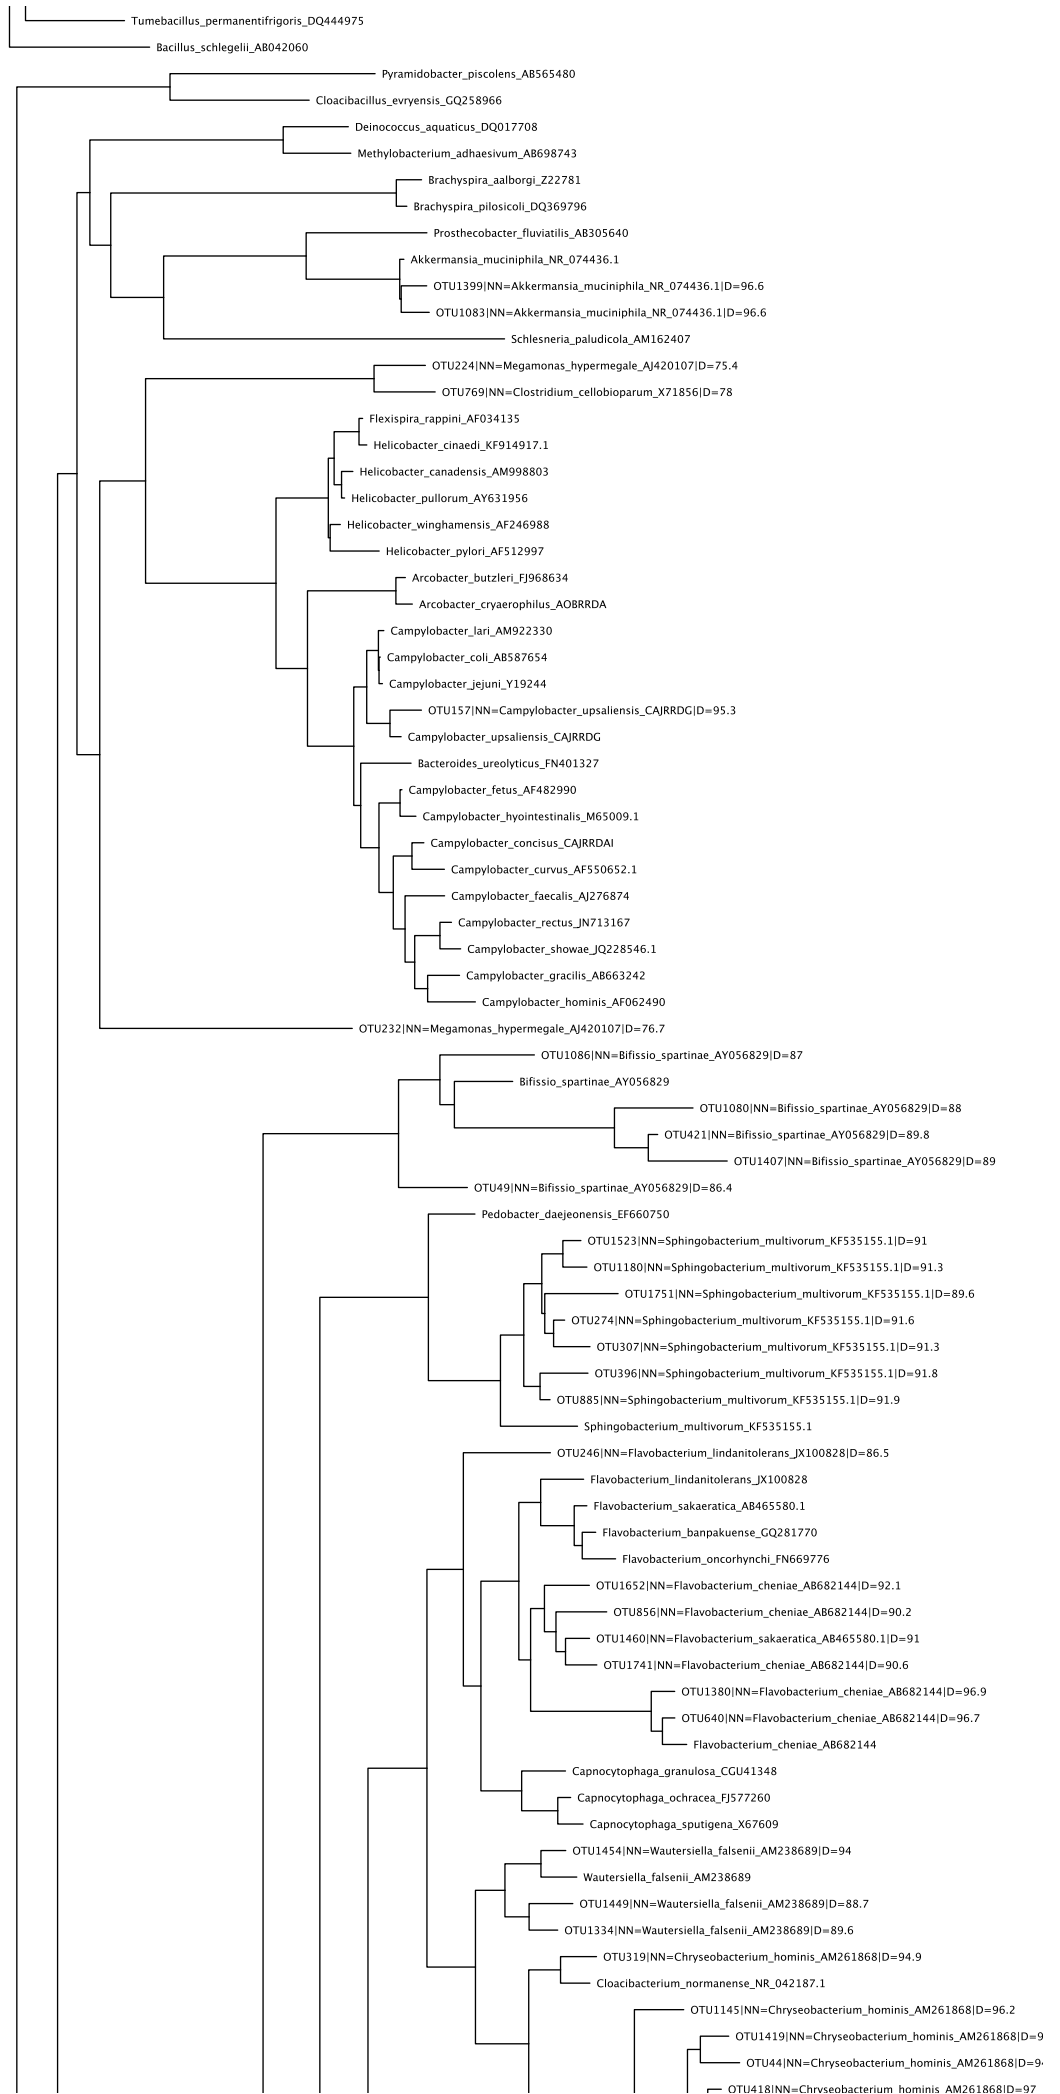

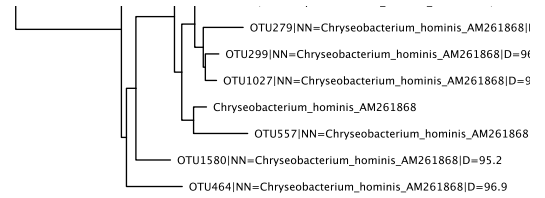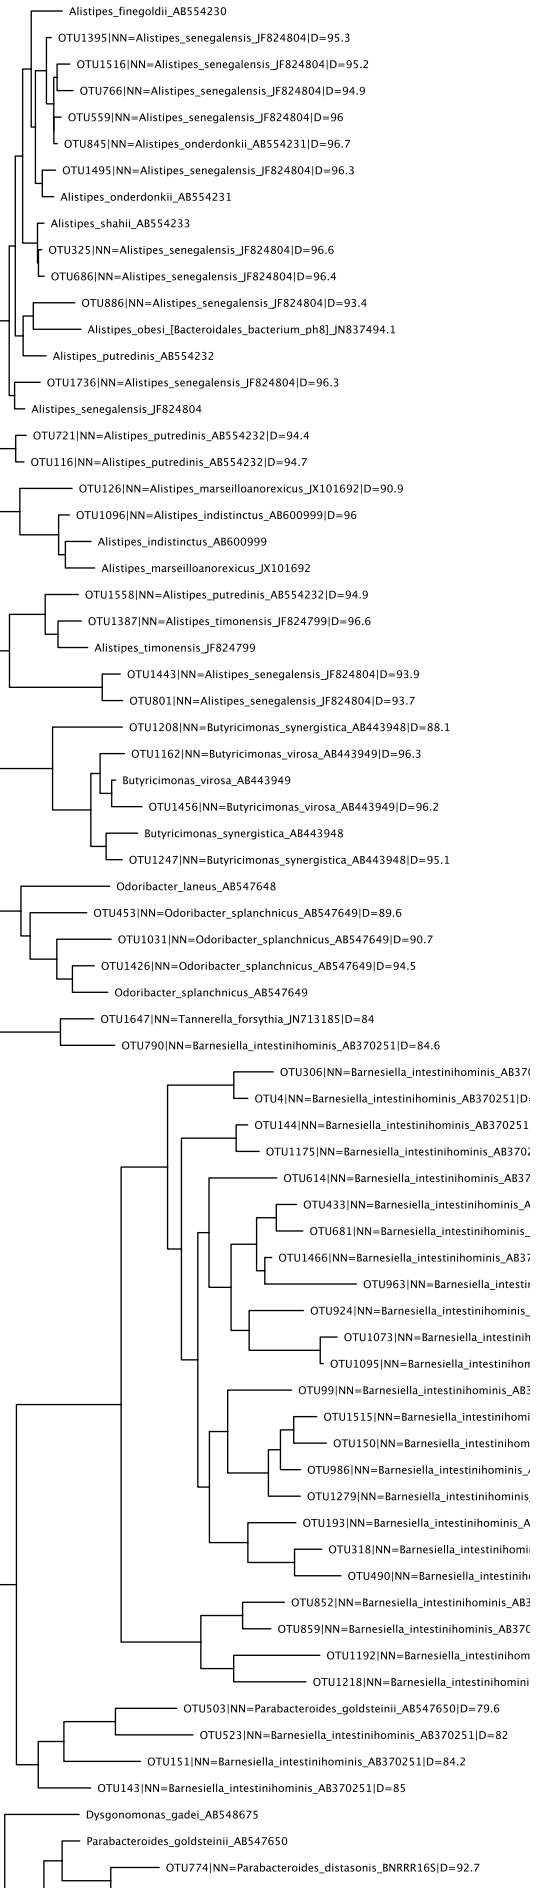

parabacteroides\_oistasonis\_BNKKR165

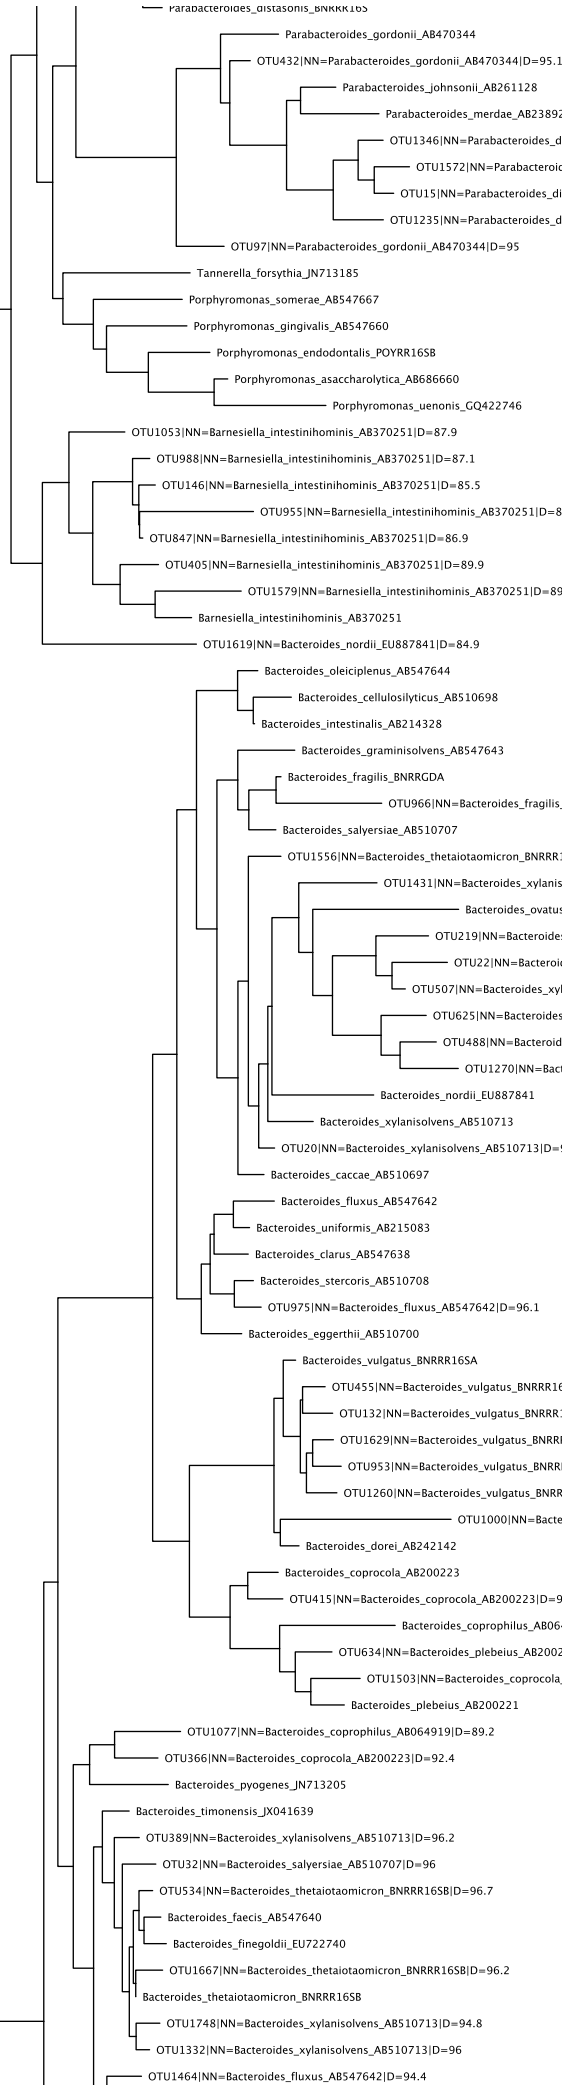

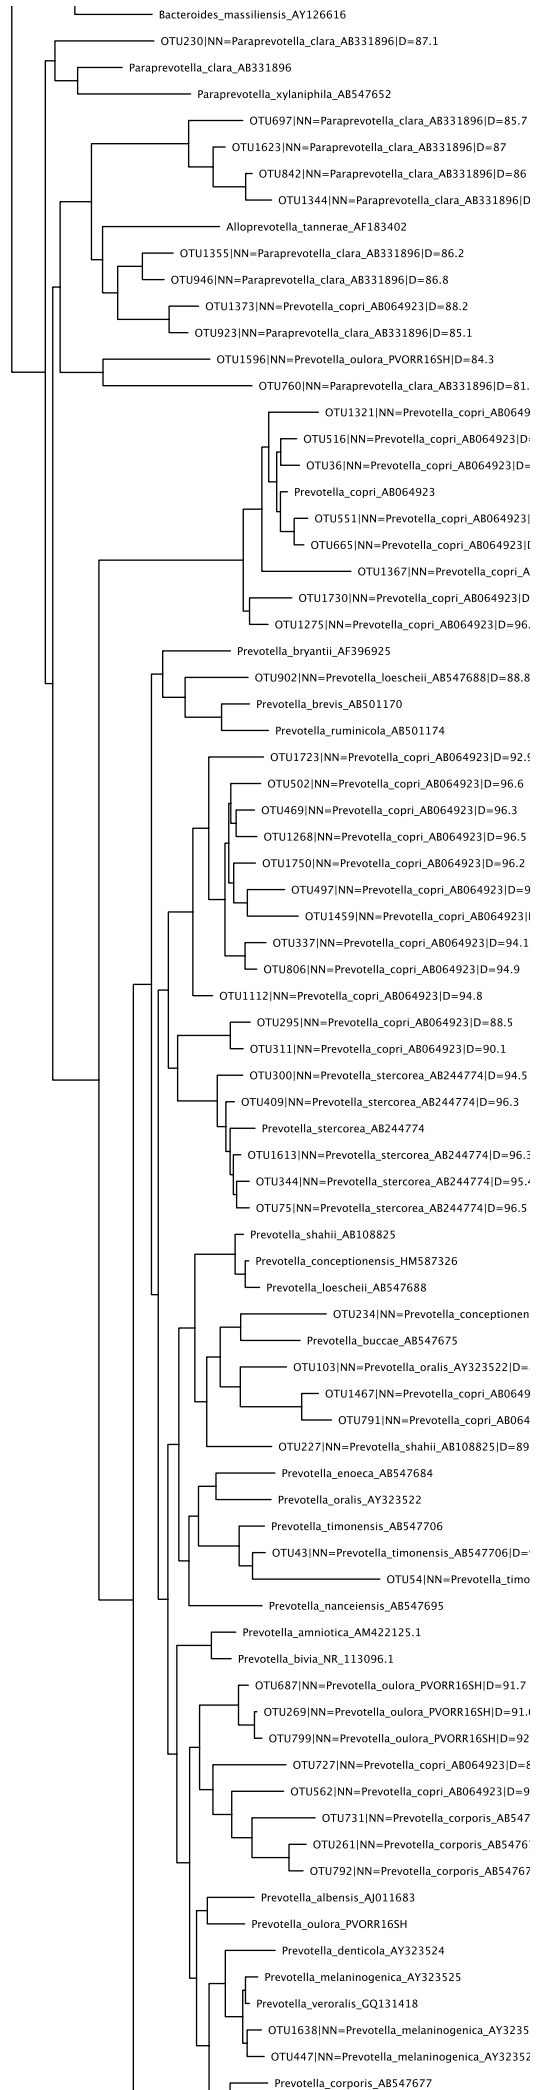

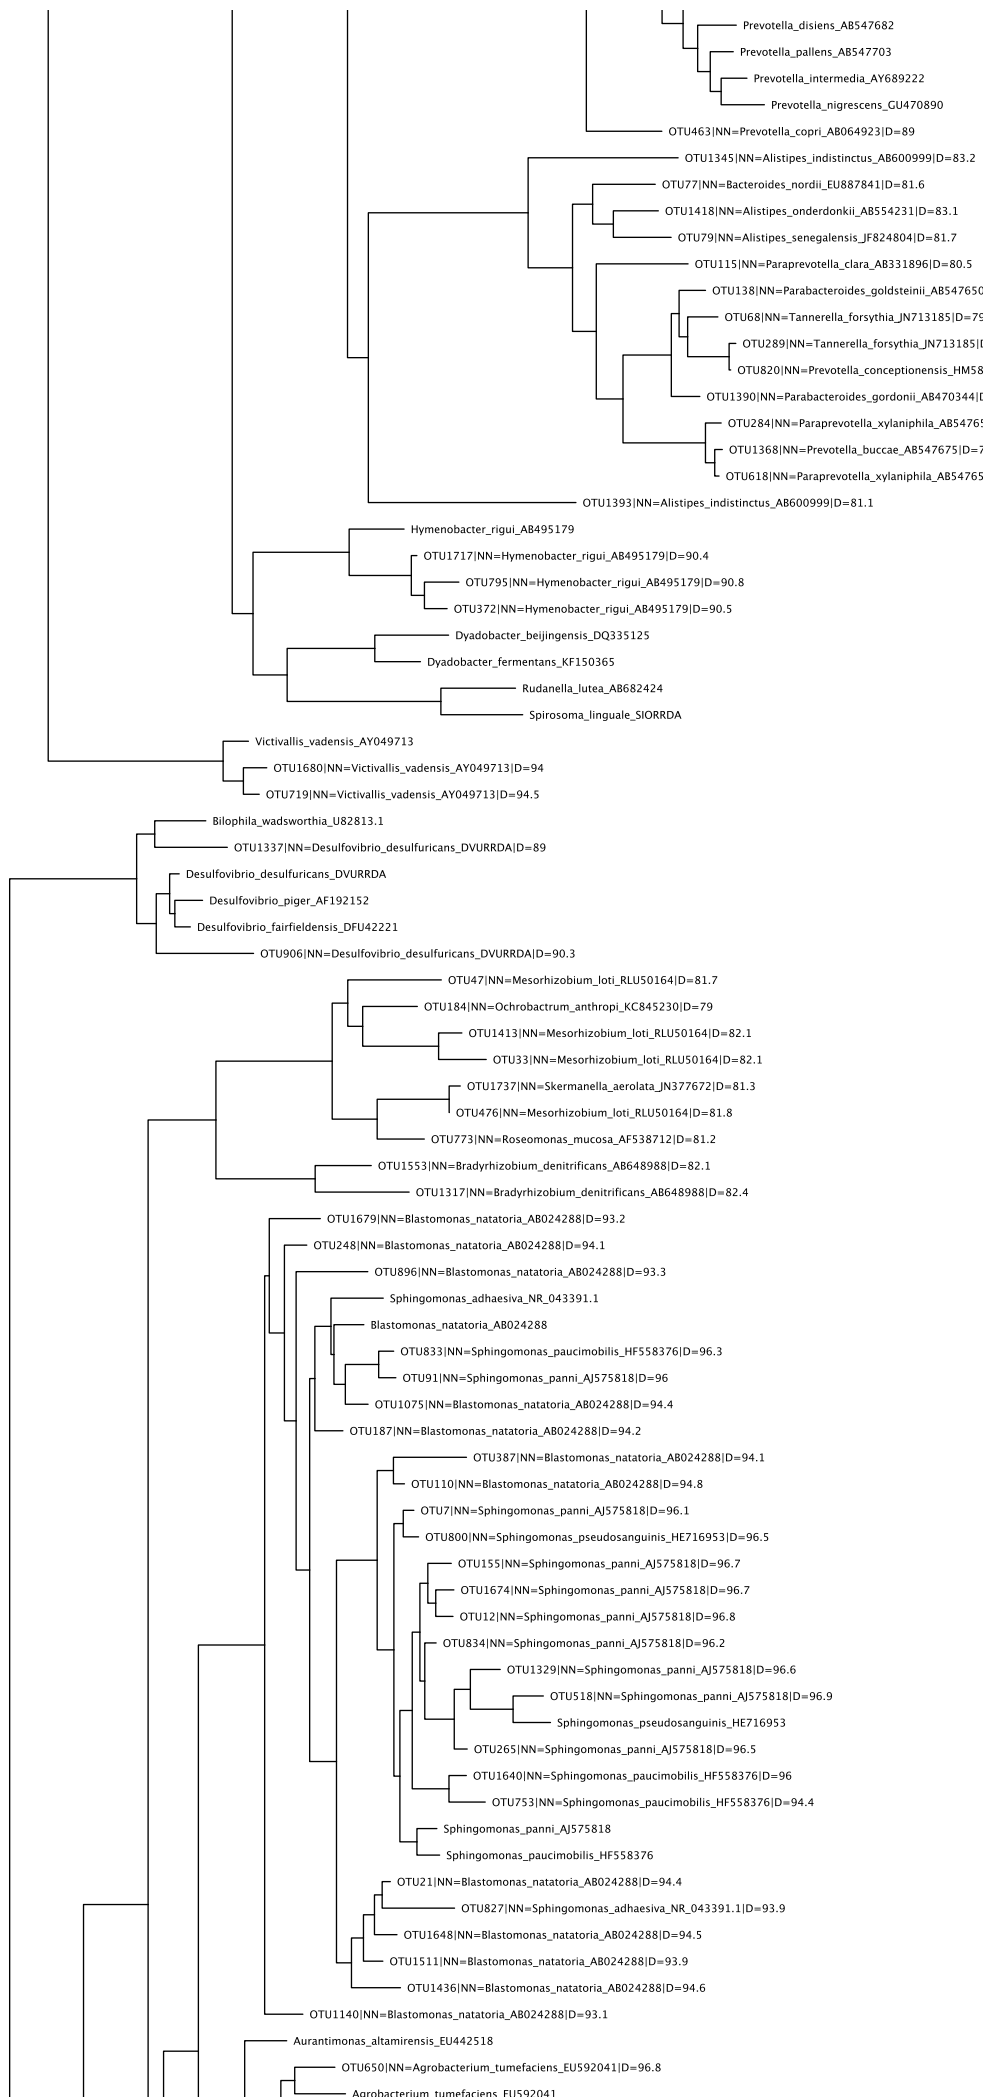

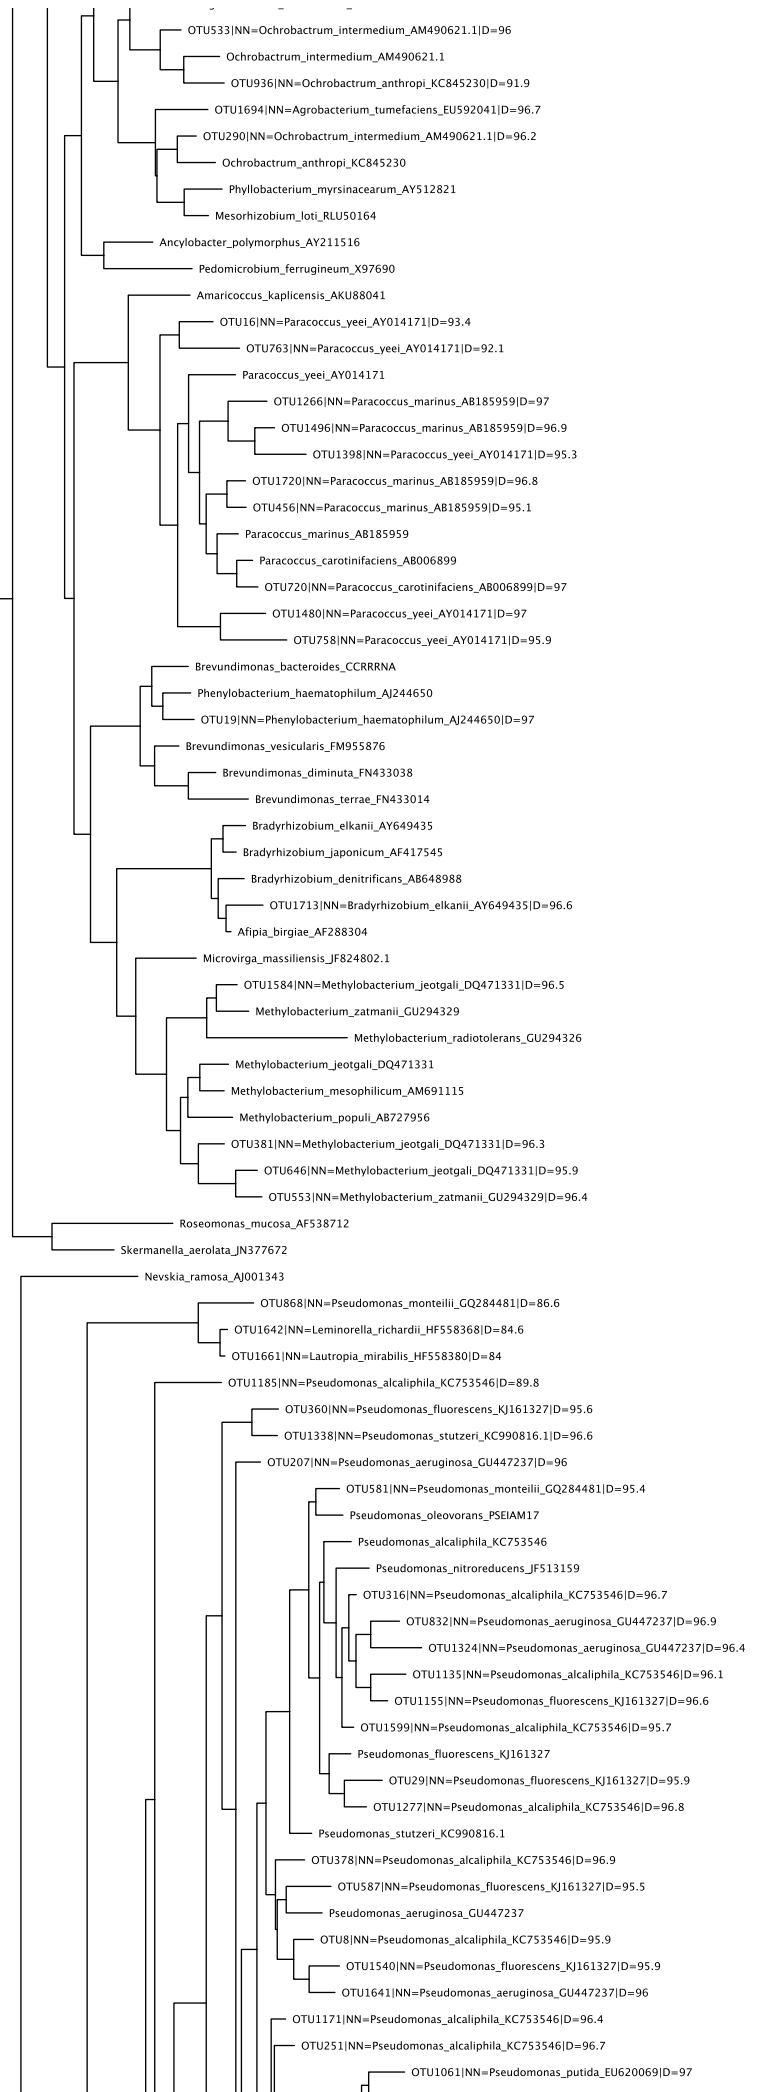

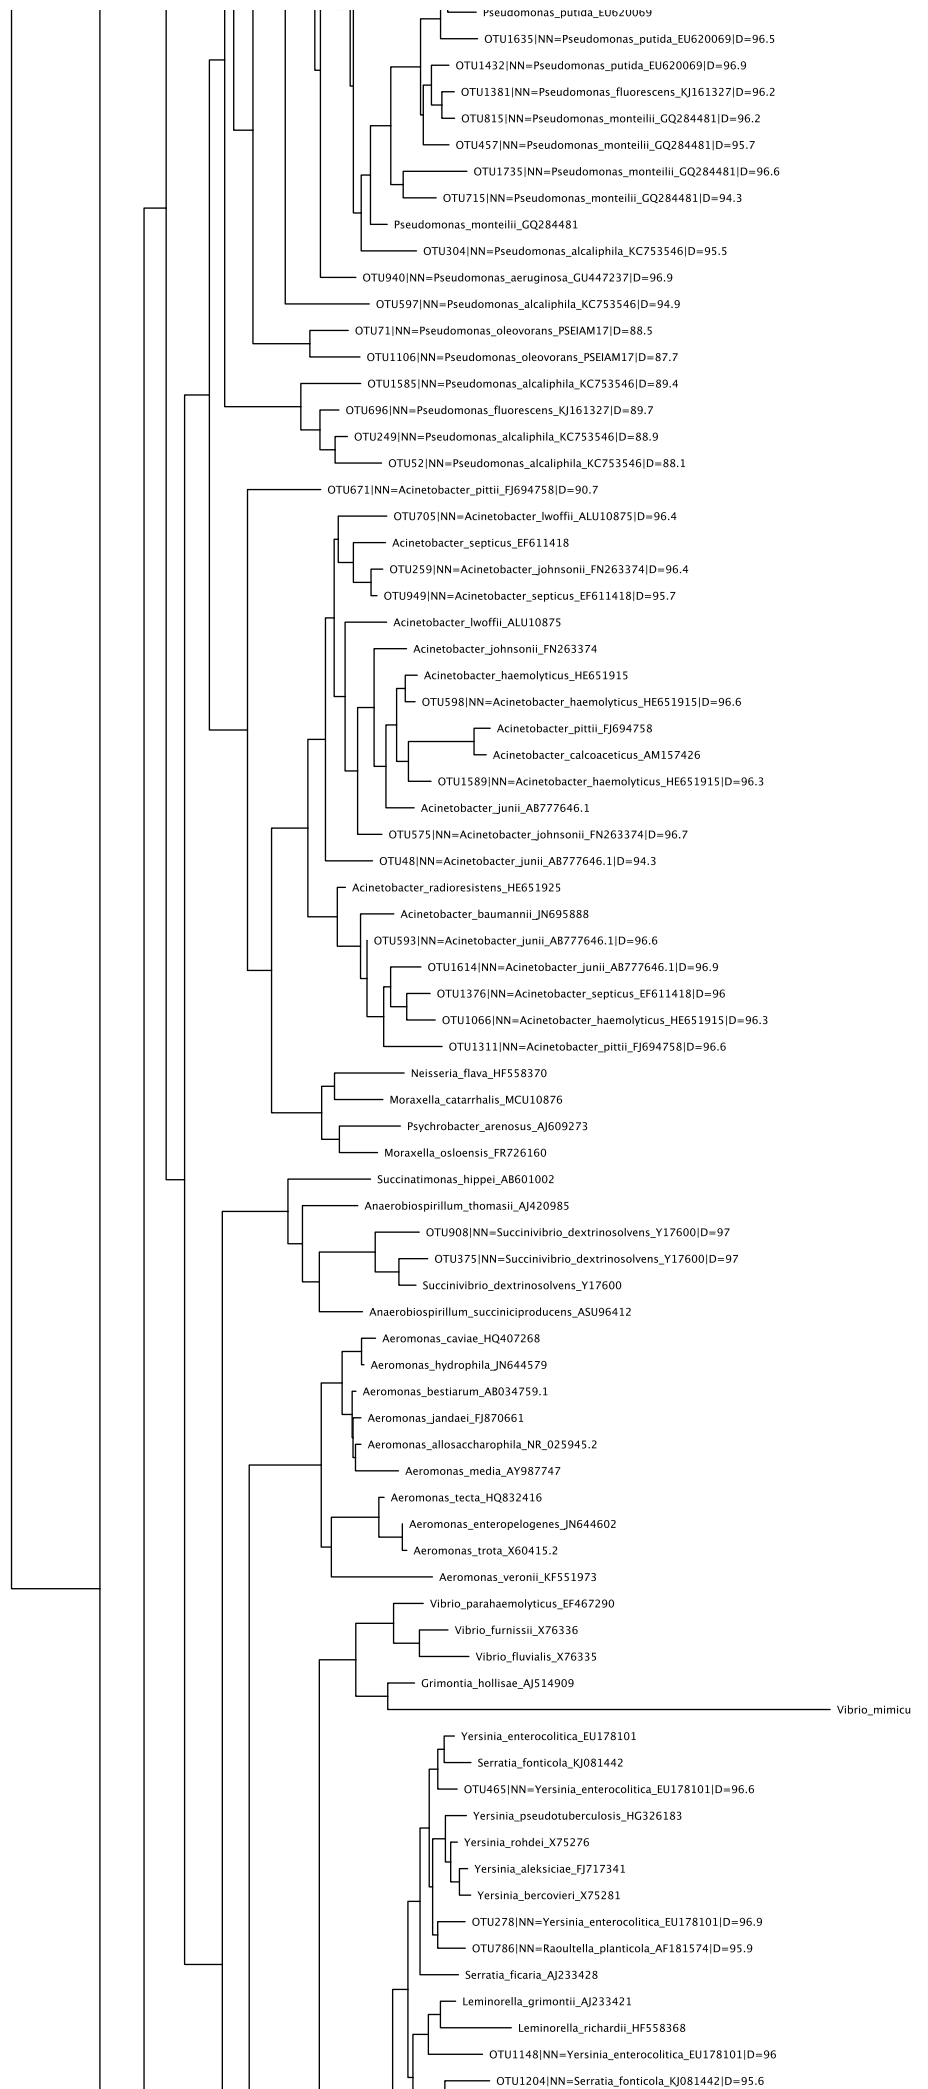



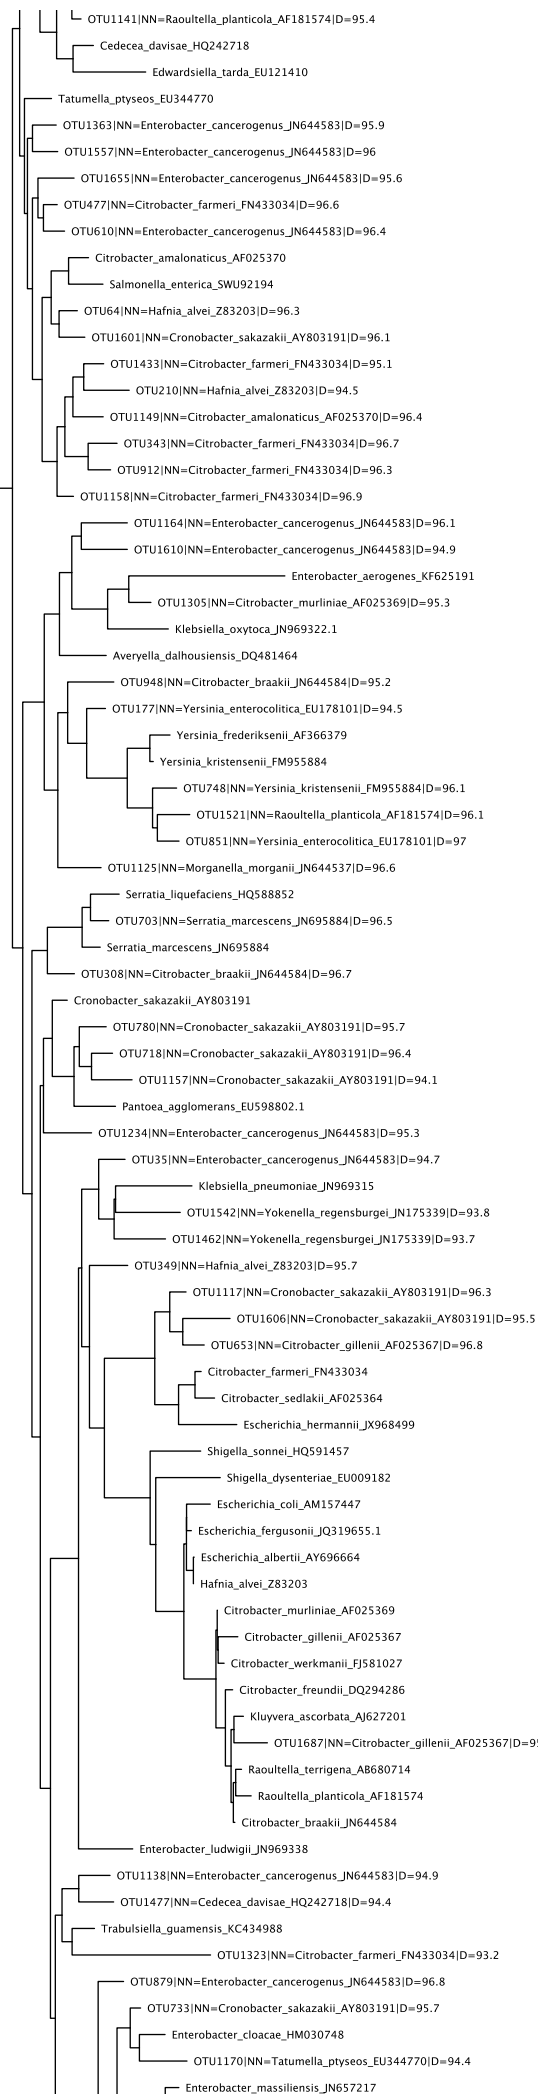

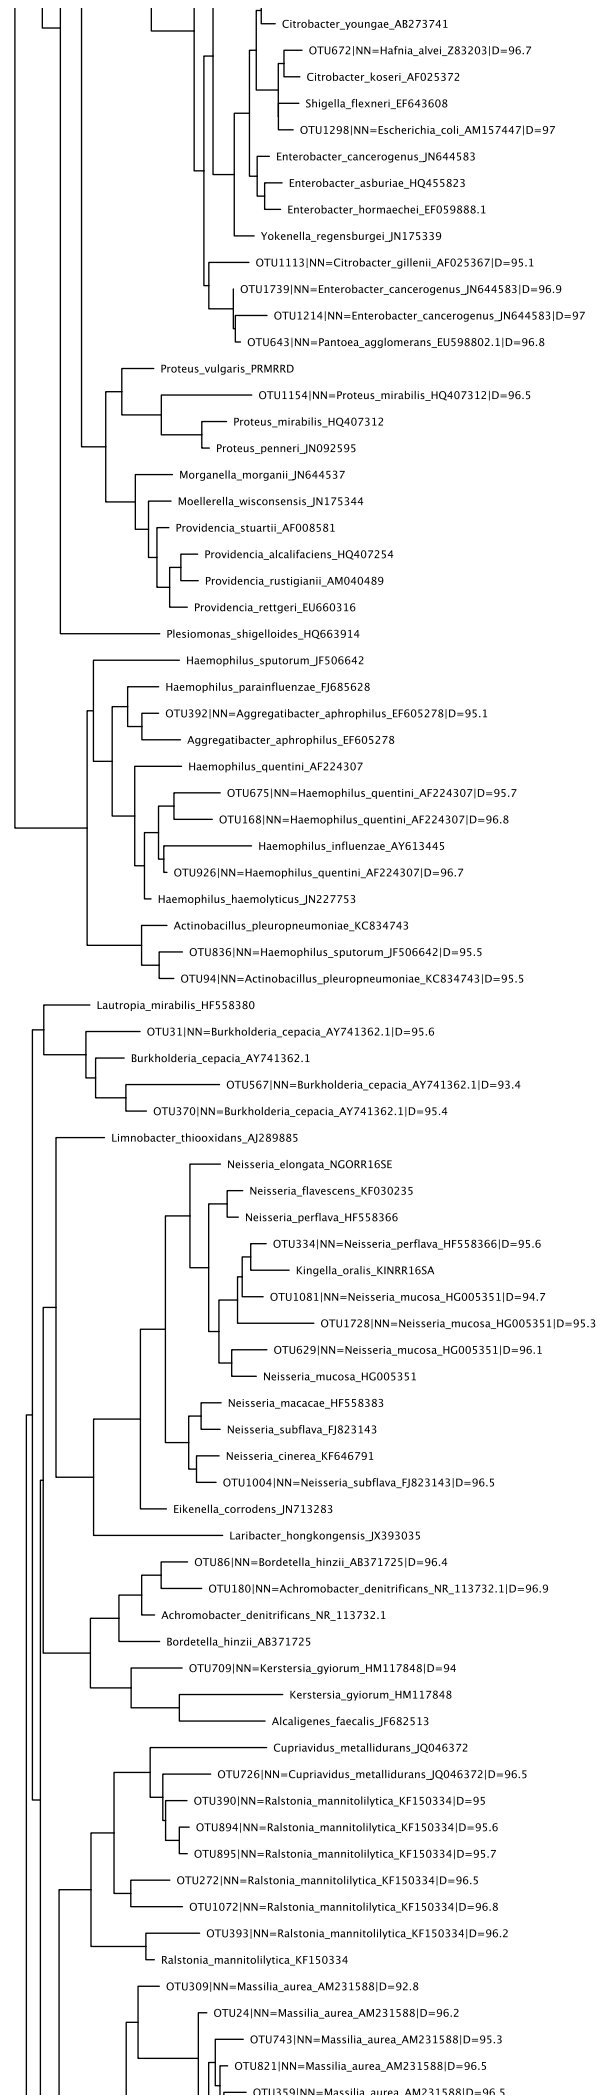

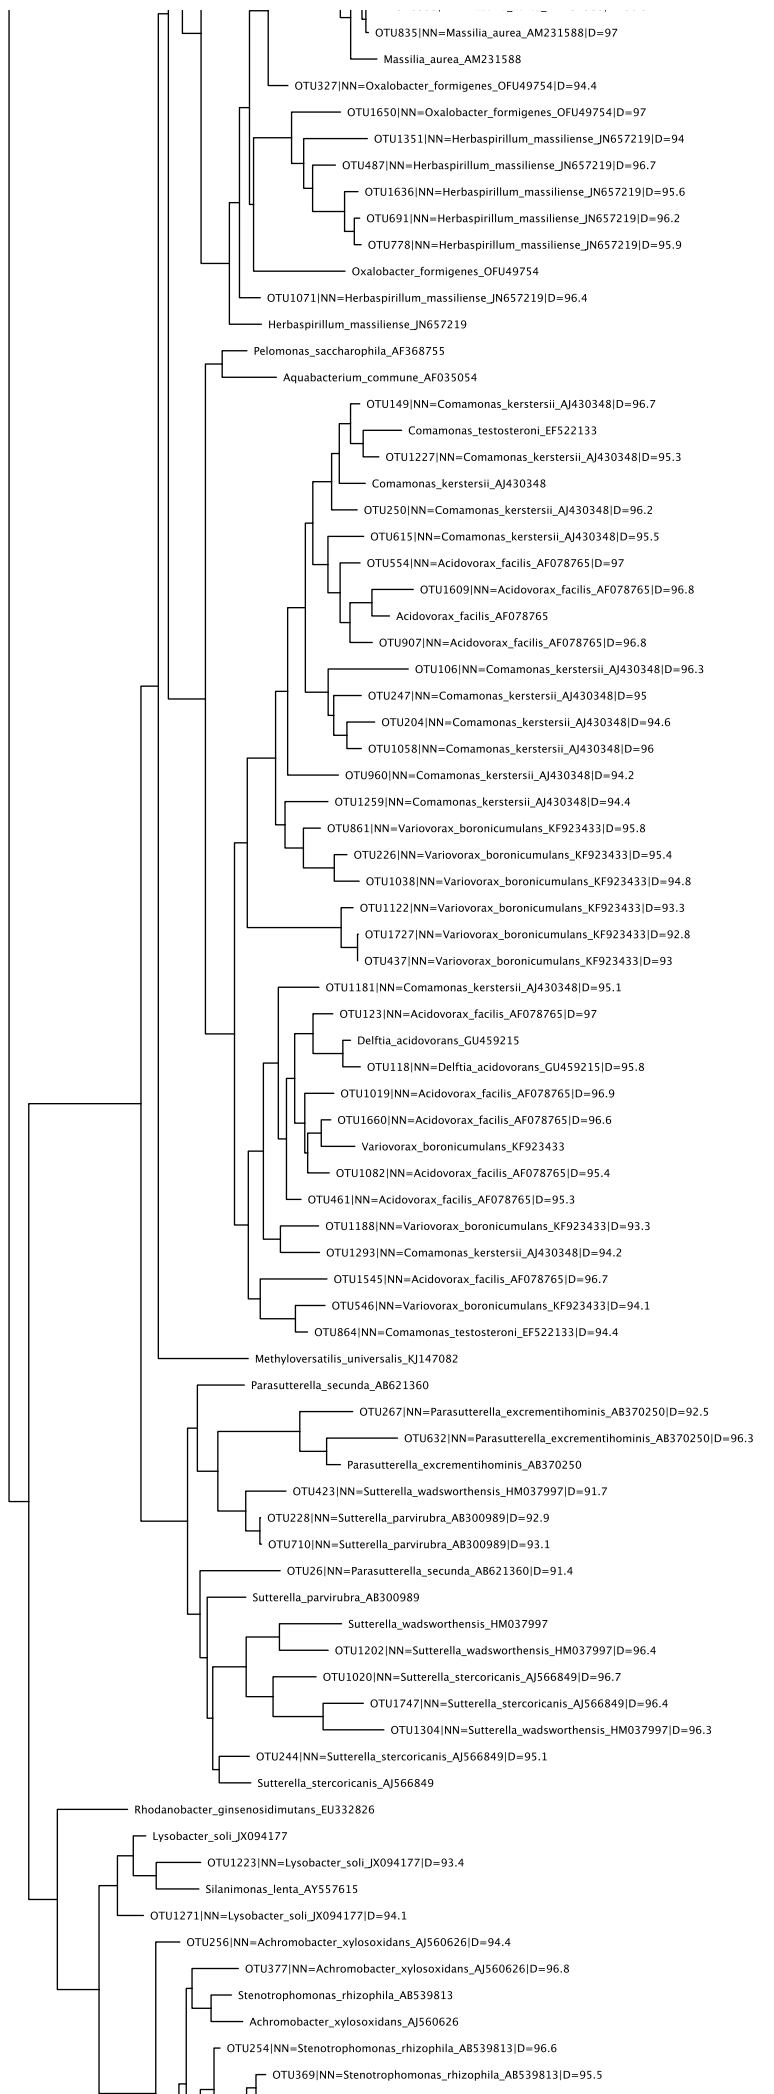

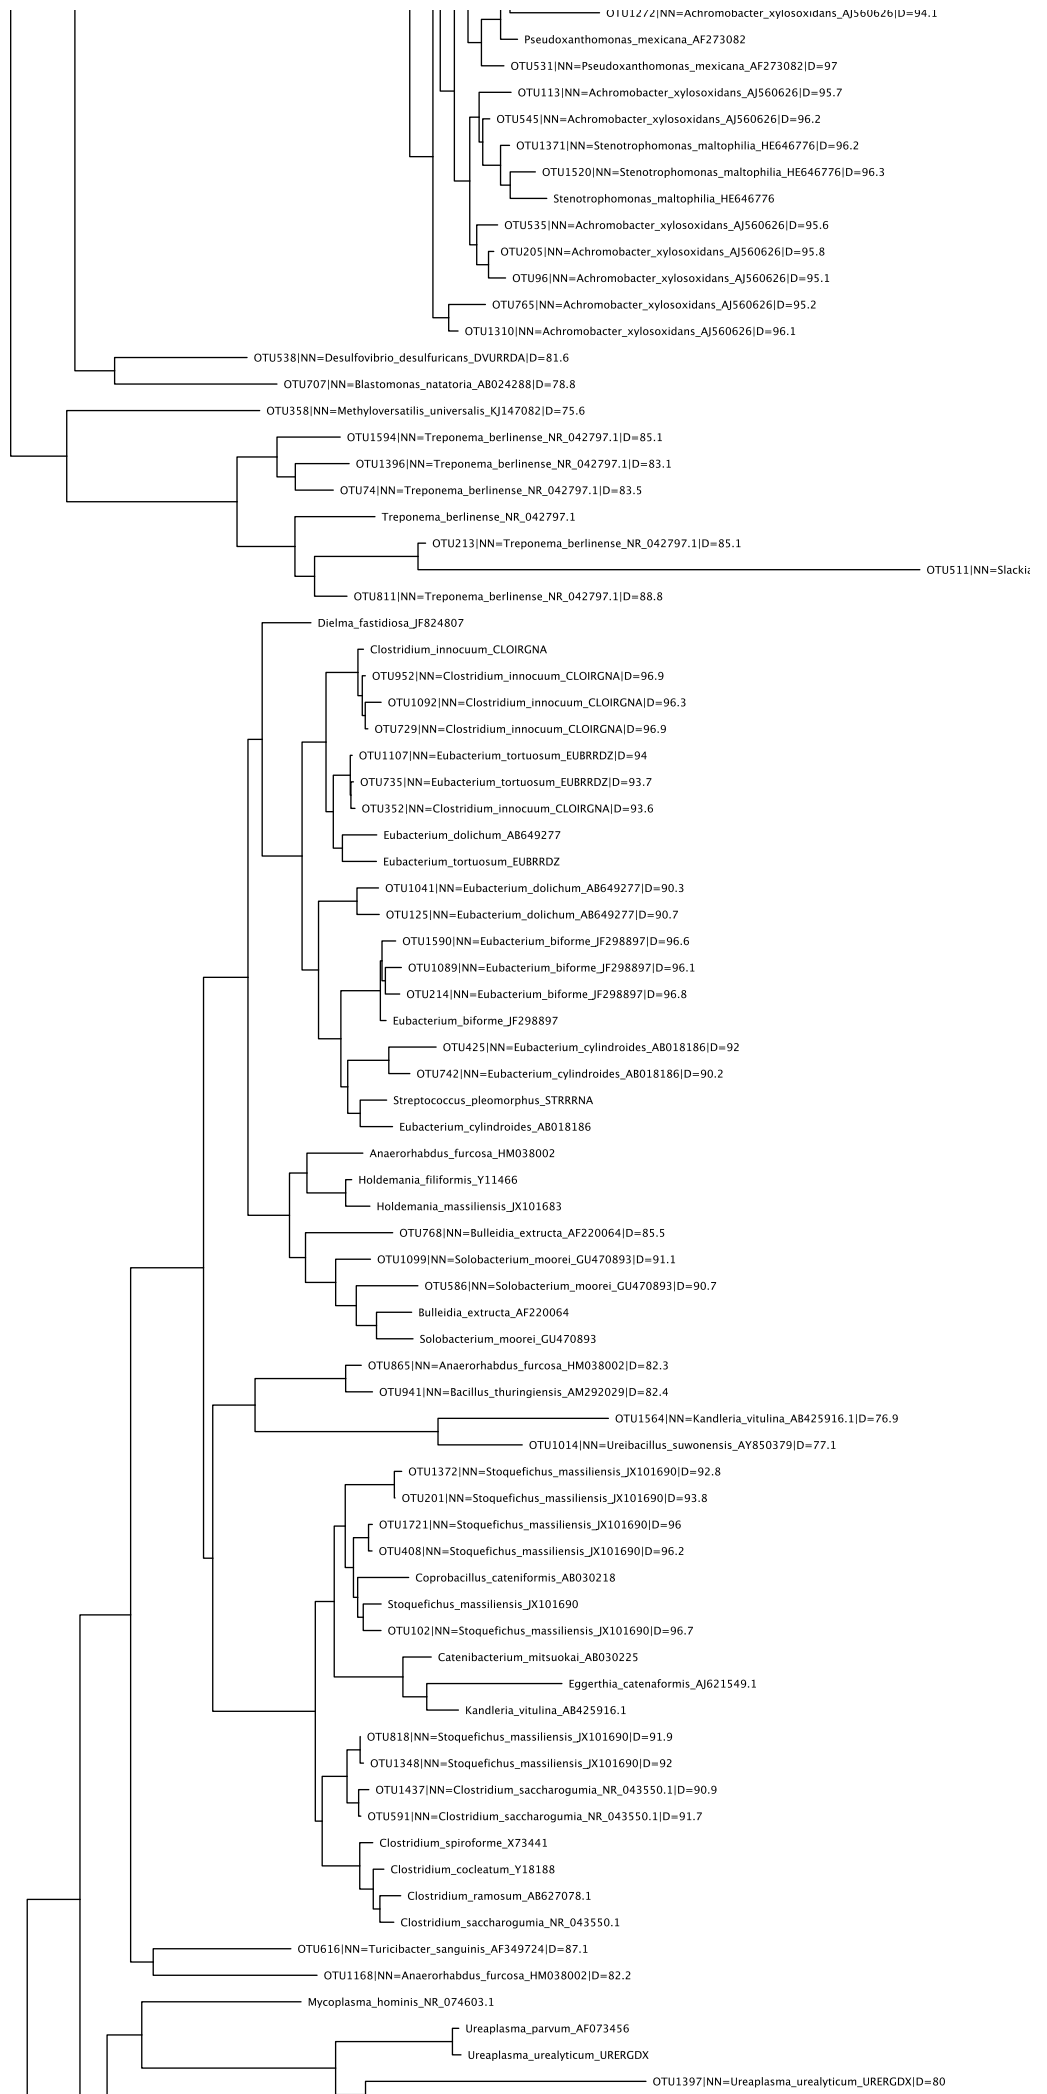

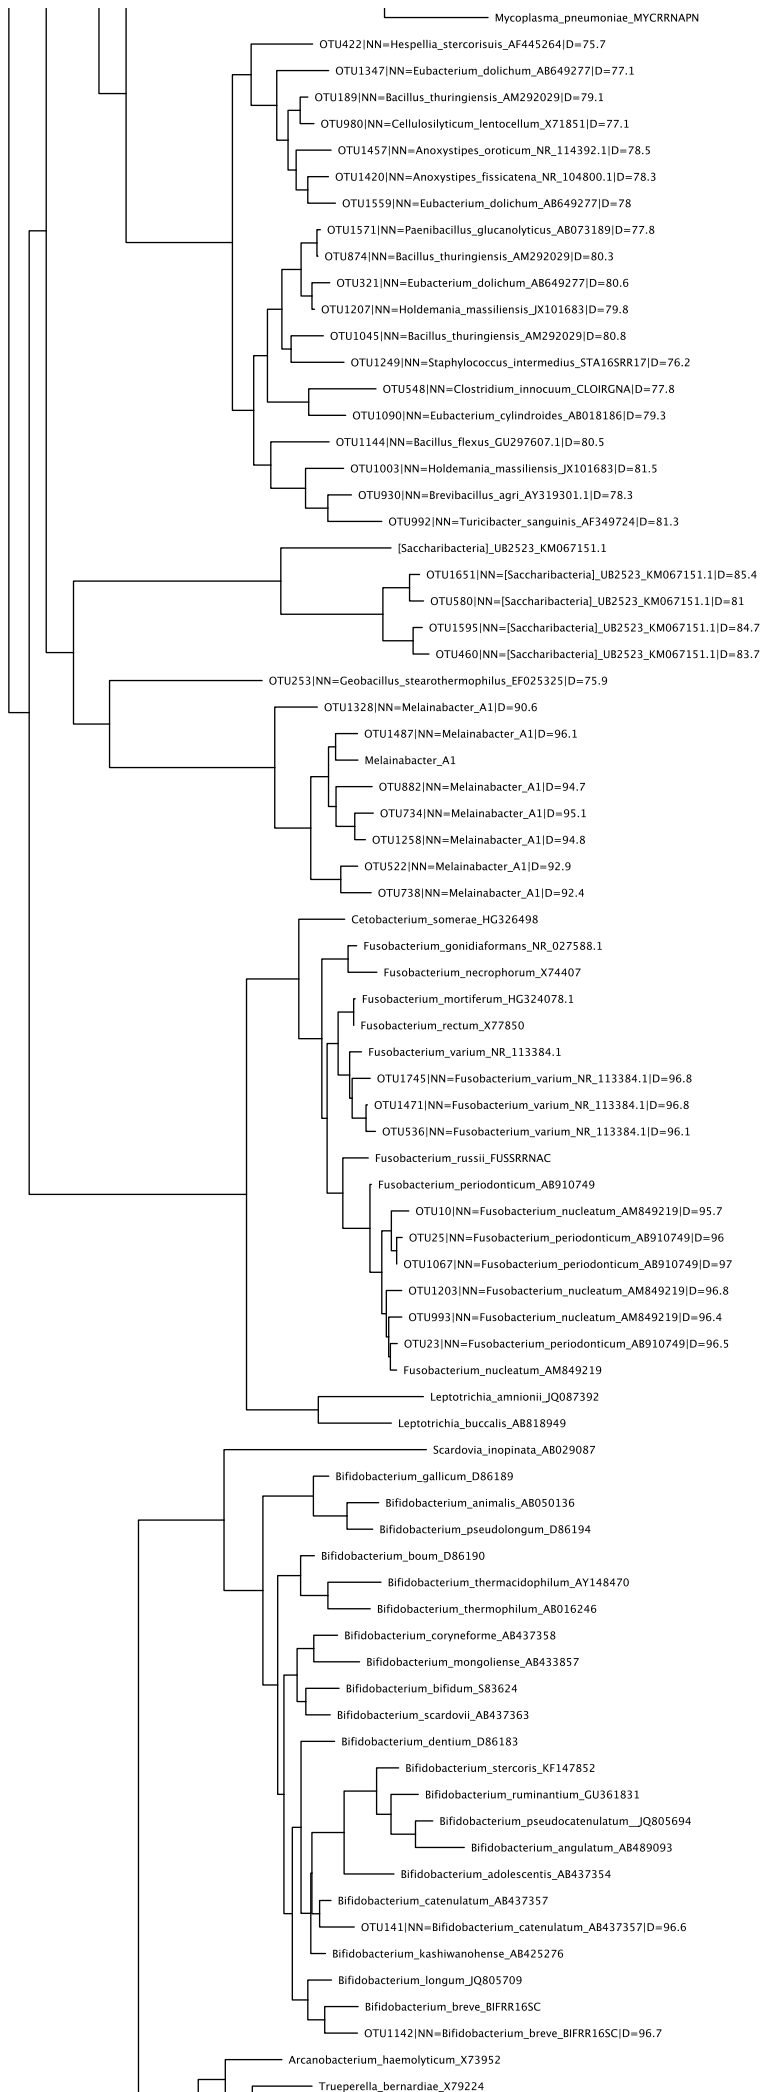

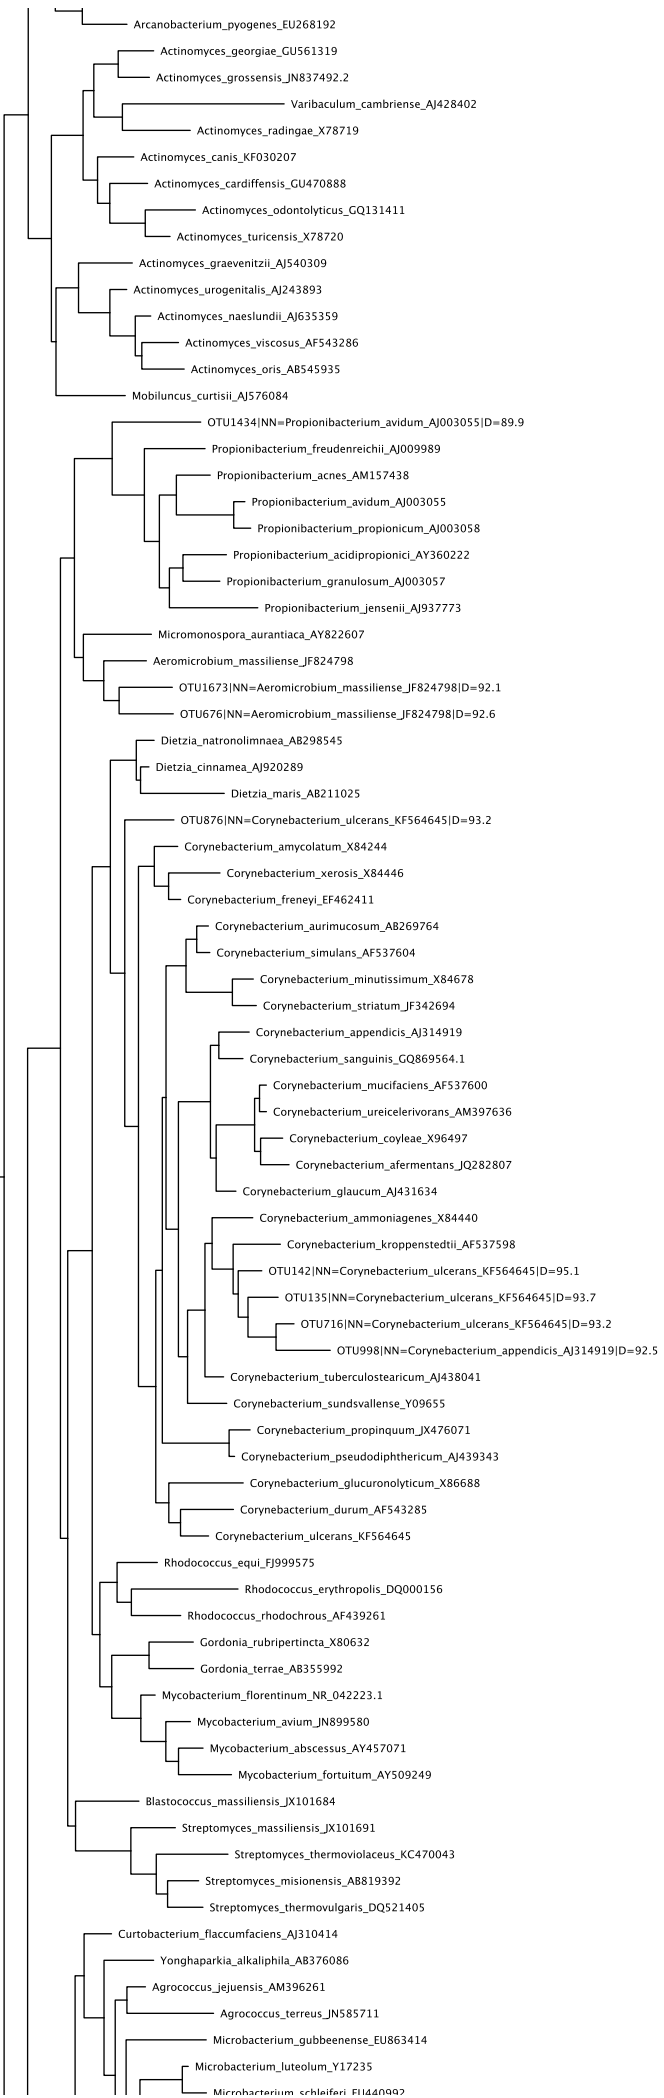

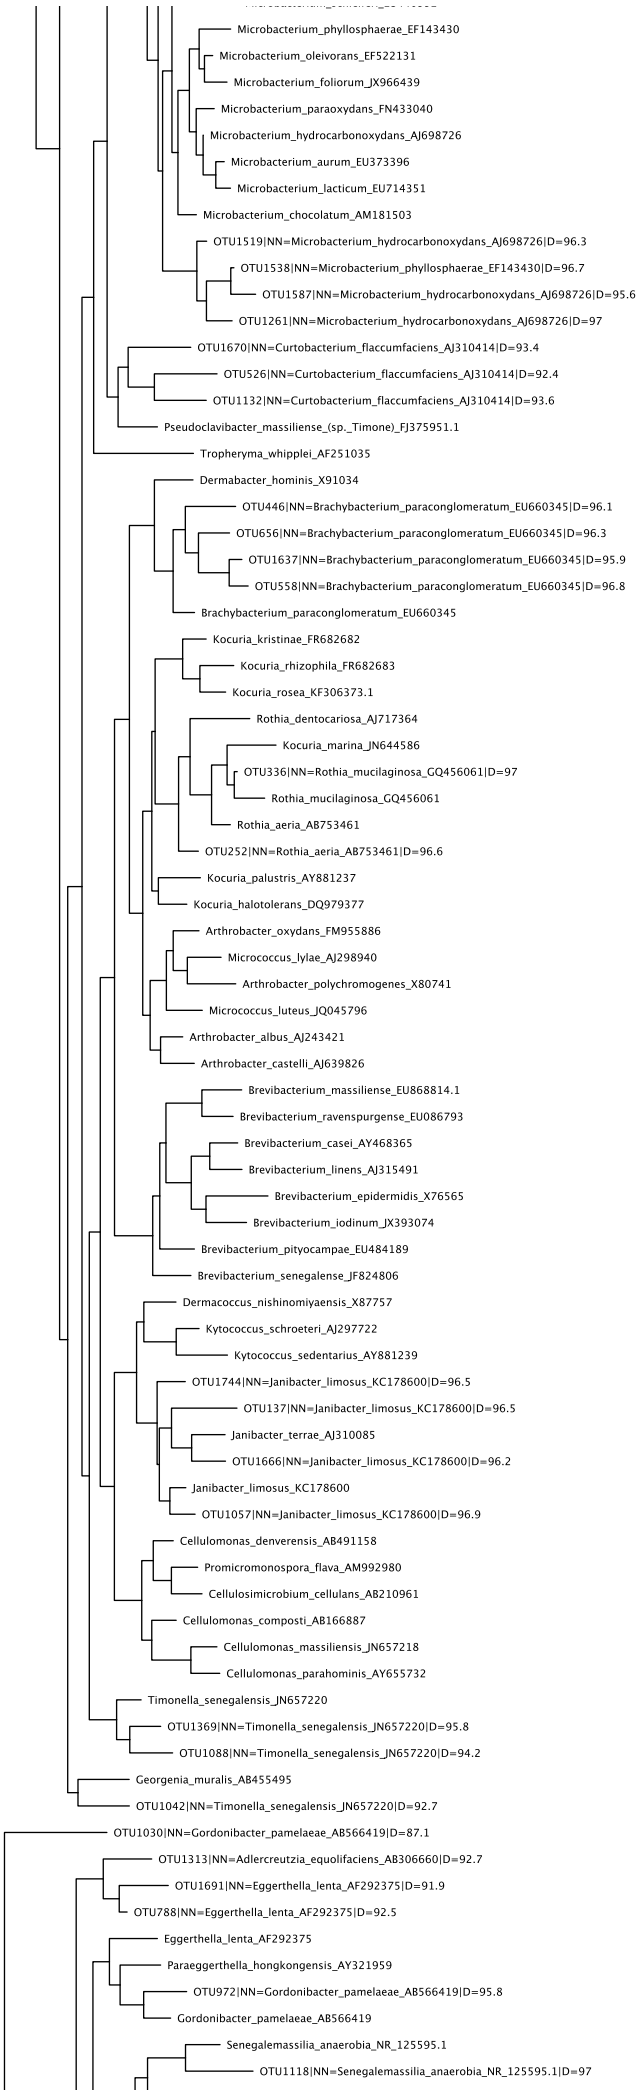

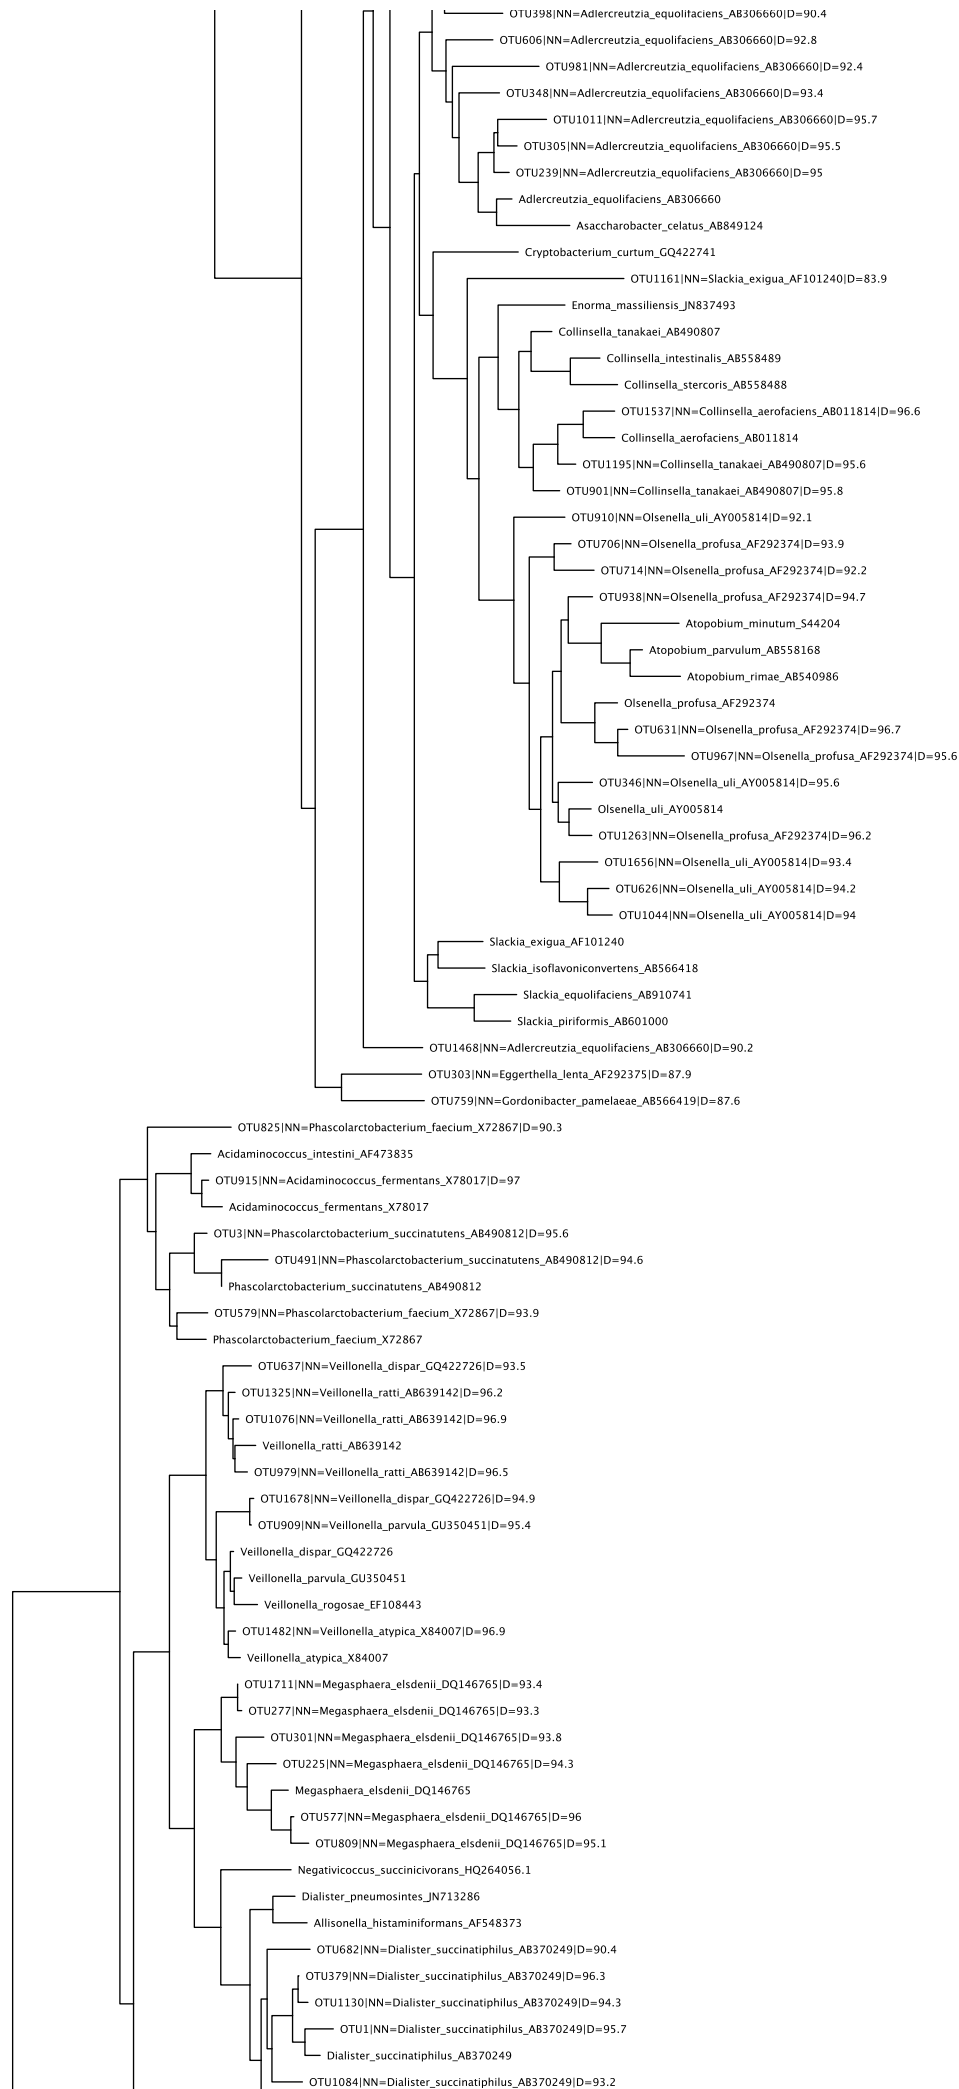



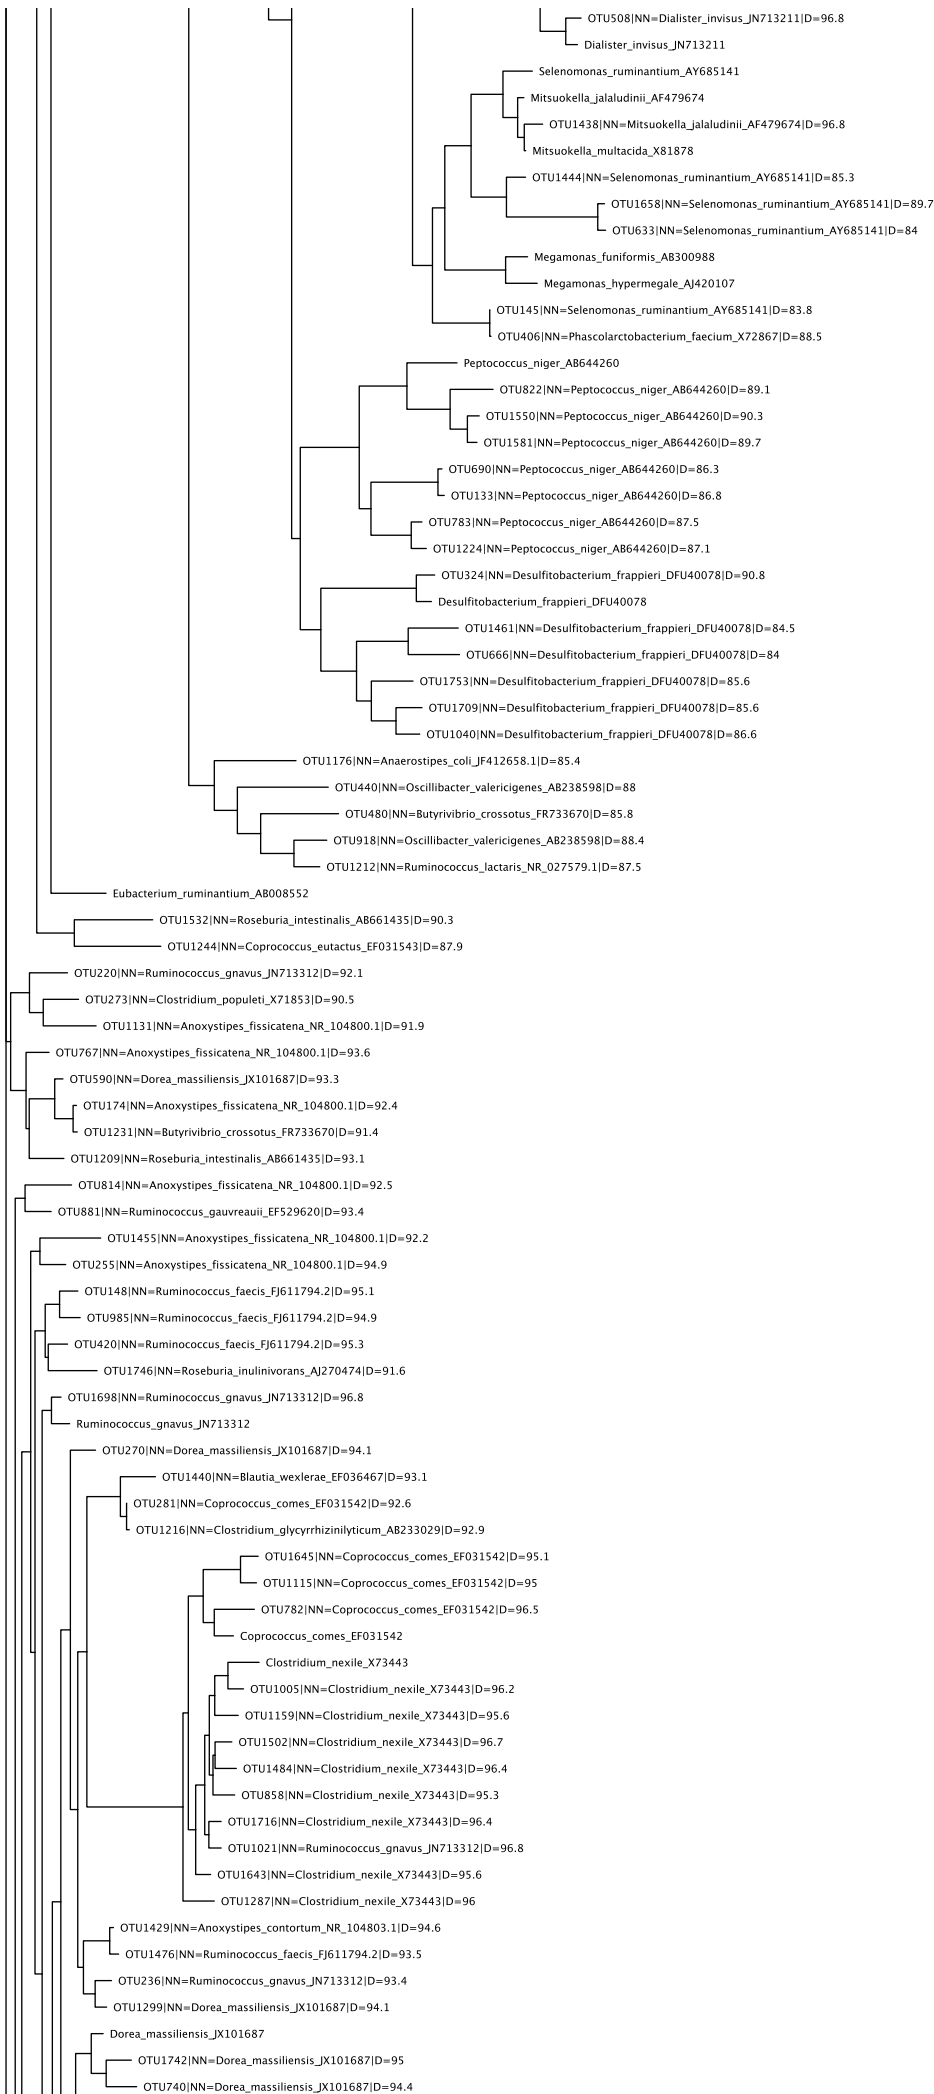

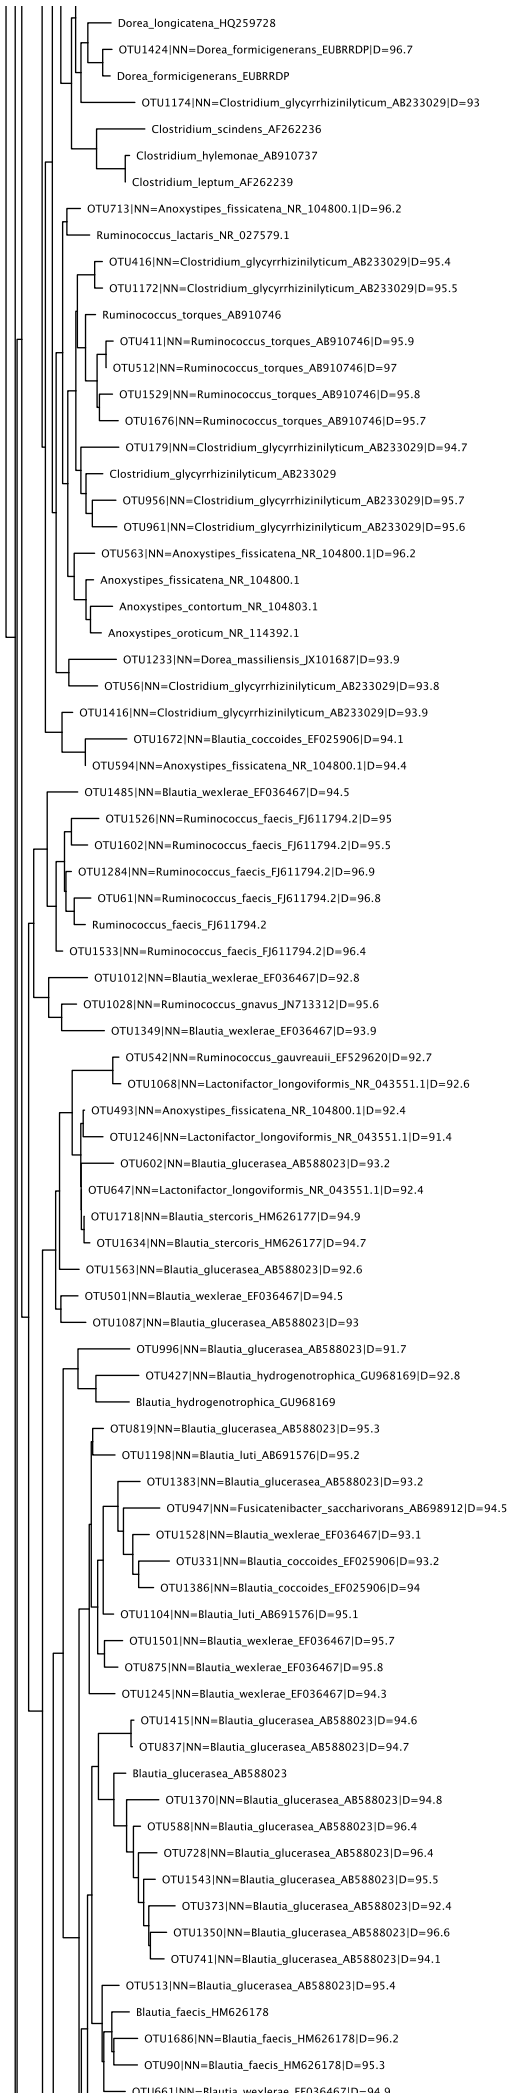

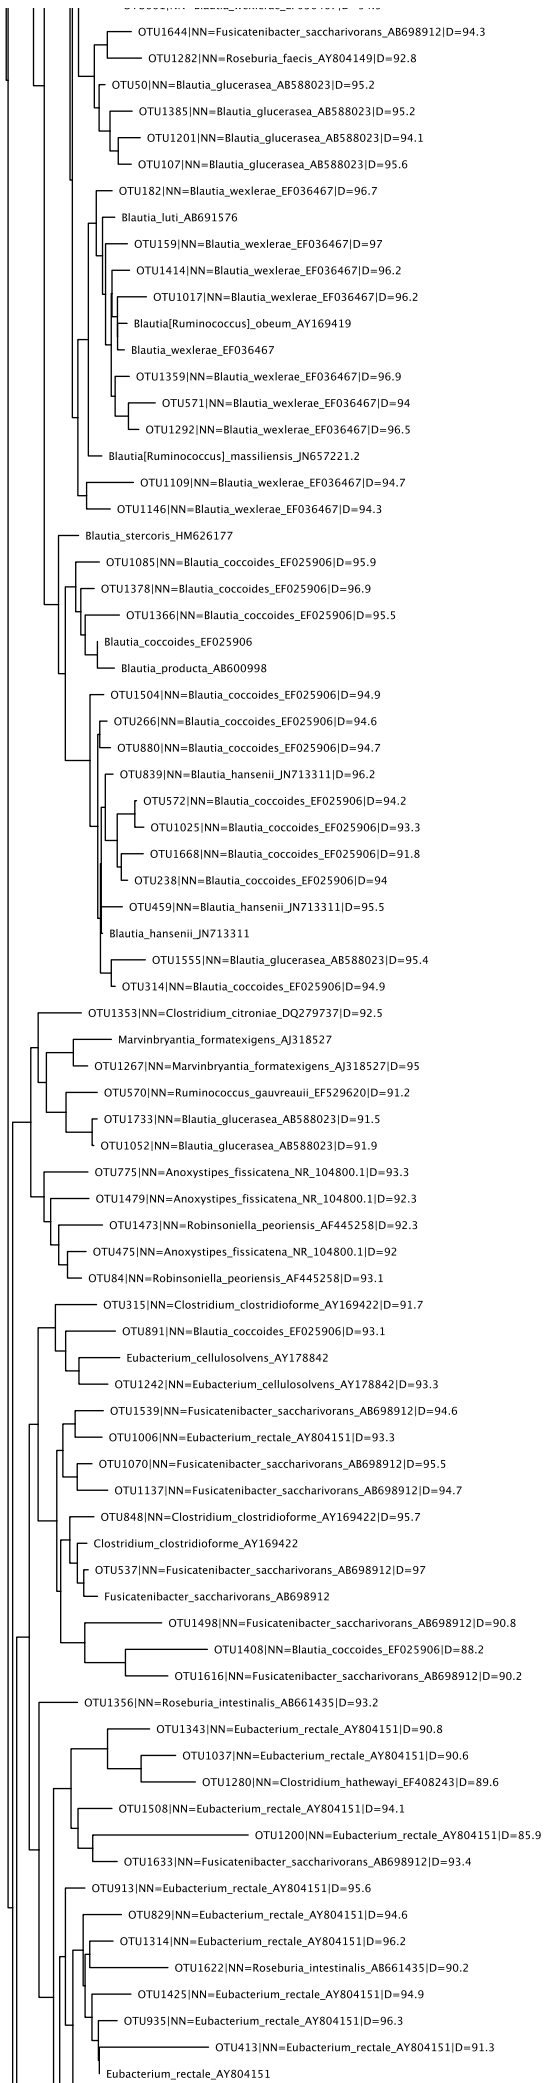

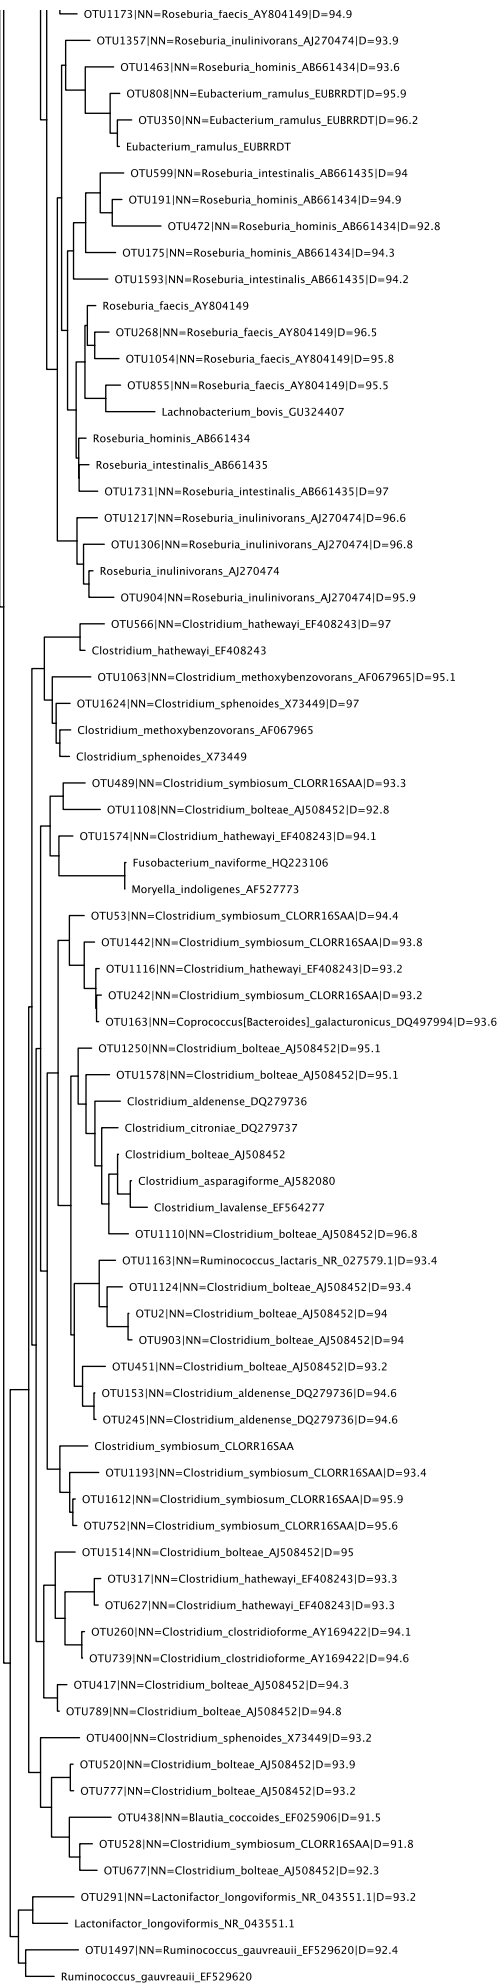

Supplement: 12864_2015_2265_MOESM1_ESM.pdf [file 12864_2015_2265_MOESM1_ESM.pdf]
